# 1 **Cooperative Chikungunya virus membrane fusion and its sub-** 2 **stoichiometric inhibition by CHK-152 antibody**

## 3 **Authors & affiliations**

- 4 • Jelle S. Blijleven, Zernike Institute for Advanced Materials, University of Groningen,  
5 Groningen, the Netherlands, [j.s.blijleven@rug.nl](mailto:j.s.blijleven@rug.nl)
- 6 • Ellen M. Bouma, Department of Medical Microbiology and Infection Prevention, University  
7 Medical Center Groningen, University of Groningen, Groningen, the Netherlands,  
8 [e.m.bouma@rug.nl](mailto:e.m.bouma@rug.nl)
- 9 • Mareike K.S. van Duijl, Department of Medical Microbiology and Infection Prevention,  
10 University Medical Center Groningen, University of Groningen, Groningen, the Netherlands,  
11 [mks.vanduijl@gmail.com](mailto:mks.vanduijl@gmail.com)
- 12 • Jolanda M. Smit, Department of Medical Microbiology and Infection Prevention, University  
13 Medical Center Groningen, University of Groningen, Groningen, the Netherlands,  
14 [jolanda.smit@umcg.nl](mailto:jolanda.smit@umcg.nl)
- 15 • Antoine M. van Oijen, University of Wollongong, Illawarra Health and Medical Research  
16 Institute, Wollongong, Australia, [vanoijen@uow.edu.au](mailto:vanoijen@uow.edu.au)

## 17 **Abstract**

18 Chikungunya virus (CHIKV) presents a major burden on healthcare systems worldwide, but  
19 specific treatment remains unavailable. Attachment and fusion of CHIKV to the host cell membrane  
20 is mediated by the E1/E2 protein spikes. We used an in vitro single-particle fusion assay to study the  
21 effect of the potent, neutralizing antibody CHK-152 on CHIKV binding and fusion. We find that CHK-  
22 152 shields the virions, inhibiting interaction with the target membrane and inhibiting fusion.

23 Analysis of the ratio of bound antibodies to epitopes implied that CHIKV fusion is a highly  
24 cooperative process. Further, dissociation of the antibody at lower pH results in a finely balanced  
25 kinetic competition between inhibition and fusion, suggesting a window of opportunity for the spike  
26 proteins to act and mediate fusion even in the presence of antibody.

## 27 Introduction

28 Chikungunya virus (CHIKV; *Alphavirus* genus, *Togaviridae* family) is a human arthropod-borne  
29 virus causing chikungunya fever and potentially long-lasting effects such as joint pain. It has recently  
30 greatly expanded its geographic range to encompass most tropical-to-temperate regions of the  
31 world (Centers for Disease Control and Prevention (CDC), ) and is likely to spread further due to  
32 geographic expansion of the mosquito vectors that transmit the virus (Bonizzoni et al., 2013, Reiter,  
33 Fontenille & Paupy, 2006, Weaver, Forrester, 2015). No preventive medicine or specific antiviral  
34 treatment is available to counter CHIKV infection.

35 Alphaviruses are enveloped viruses in which the lipid bilayer is derived from the host plasma  
36 membrane (Jose, Snyder & Kuhn, 2009). The membrane encapsulates the protein capsid in which  
37 the viral genome resides. Two viral proteins, E1 and E2, are anchored in the membrane and arranged  
38 in trimers of E1/E2 heterodimers called spikes. The spikes cover the surface in an icosahedral lattice  
39 with triangulation  $T = 4$ , giving rise to 80 spikes, or 240 copies of the E1-E2 heterodimers in total  
40 (Voss et al., 2010). The E2 protein facilitates alphavirus binding to cellular receptors (Smith et al.,  
41 1995, Ashbrook et al., 2014), and both the E1 and E2 proteins play an important role in the process  
42 of membrane fusion.

43 A critical step in the reproduction cycle of enveloped viruses involves the merger of the viral  
44 membrane with the host cellular membrane to deliver the genome to the host cell and start a new  
45 cycle of viral replication (reviewed by Harrison (Harrison, 2015)). However, membrane fusion does  
46 not occur spontaneously on biological timescales due to high kinetic barriers between the  
47 intermediates (Chernomordik, Kozlov, 2008). Enveloped viruses therefore have envelope proteins  
48 that catalyze membrane fusion (reviewed by Kielian (Kielian, 2014)), to deliver the viral genome at  
49 the right time to the right place in the host cell. Upon attachment of CHIKV to the cell, the virion is  
50 taken up into an endosomal compartment, mainly by clathrin-mediated endocytosis (Bernard et al.,  
51 2010). Membrane fusion is initiated at the mildly acidic pH of the early endosome (Hoornweg et al.,

52 2016, van Duijl-Richter et al., 2015), triggering the E1-E2 heterodimers to dissociate (Voss et al.,  
53 2010, Wahlberg, Boere & Garoff, 1989). The E1 proteins subsequently insert into the endosomal  
54 membrane and trimerize to form the functional units of fusion (Wahlberg et al., 1992, Cao, Zhang,  
55 2013). Multiple trimers are thought to be necessary to concertedly bring both membranes together  
56 (van Duijl-Richter et al., 2015, Zheng et al., 2011, Gibbons et al., 2004), first leading to a hemifused  
57 intermediate where the proximal leaflets have merged, and finally opening a pore to deliver the viral  
58 genome into the cellular cytosol.

59 There is currently no vaccine or treatment available against CHIKV, but several promising  
60 antibodies have been isolated and were shown to prevent CHIKV infection (Clayton, 2016). A potent  
61 antibody is CHK-152, that was found to protect against CHIKV infection in mouse and non-human  
62 primate models (Pal et al., 2013, Pal et al., 2014). Mutational and cryo-EM reconstruction studies  
63 showed that it binds to the acid-sensitive region of E2. This region becomes disordered at low pH  
64 thereby facilitating exposure of the E1 fusion loop (Voss et al., 2010, Li et al., 2010, Sun et al., 2013).

65 In this study, we found that CHK-152 strongly interferes with CHIKV membrane interactions both  
66 at neutral and low pH. Additionally, in a single-particle fluorescence microscopy assay, fusion of  
67 particles that were already docked to the membrane was blocked and slowed down. At pH 6.1 and  
68 sub-stoichiometric antibody binding, fusion was efficiently inhibited. This effect was diminished at  
69 pH 5 and 4.7 as at these pH values CHK-152 was found to dissociate from the virus particles. We  
70 explain the results in a model of CHIKV fusion as mediated by multiple E1 trimers formed from CHK-  
71 152-free spikes. The stoichiometry of antibody binding implies a cooperative fusion mechanism,  
72 where three to five neighboring E1 trimers are required to mediate membrane fusion.

## 73 **Results**

74 To delineate the different mechanistic effects of the CHK-152 antibody on the fusion process we  
75 set out to separately characterize membrane binding and fusion. By using a combination of binding

76 assays, we studied the effect of CHK-152 on membrane interactions. These experiments were  
77 followed by a single-particle assay with pre-docked particles to directly investigate the effect of CHK-  
78 152 on membrane fusion, and to determine the stoichiometry of neutralization.

### 79 **CHK-152 shields virions thereby preventing neutral-pH membrane interaction**

80 First, we wanted to determine the effect of CHK-152 on nonspecific membrane interaction at  
81 neutral pH. A planar, lipid membrane was formed by using a flow cell constructed on top of a  
82 hydrophilic microscope coverslip and introducing liposomes (Floyd et al., 2008). The receptor-free  
83 bilayer incorporated DOPC, DOPE, sphingomyelin and cholesterol, the latter two lipids being  
84 stimulating and required factors for fusion (van Duijl-Richter et al., 2015, Klimjack, Jeffrey & Kielian,  
85 1994, Nieva et al., 1994, Ahn, Gibbons & Kielian, 2002). CHIKV particles were UV inactivated to  
86 render them non-infectious and were labeled with the lipophilic dye R18. After labeling, they were  
87 incubated with varying concentrations of CHK-152 antibody and flown into the flow cell to dock to  
88 the membrane. After rinsing with buffer, the number of particles sticking to the bilayer was  
89 quantified by single-particle fluorescence microscopy (more detail below, in Figure 3 and Methods).  
90 Particle counts normalized to the same conditions but in the absence of CHK-152 are shown in  
91 Figure 1a on double log scale.

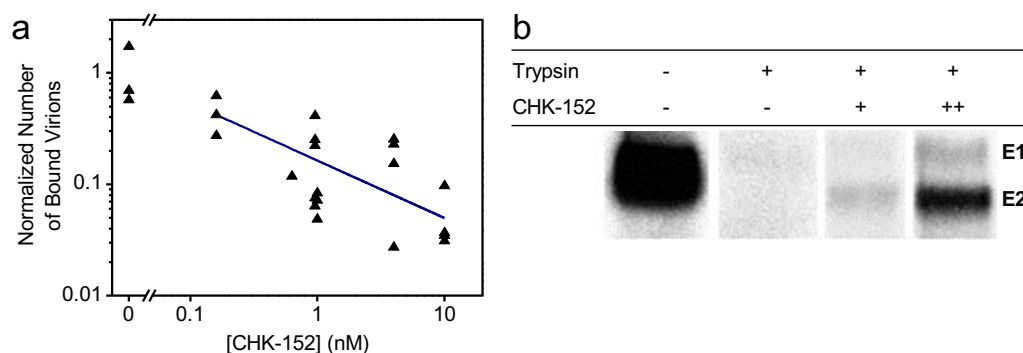

92

93 **Figure 1 Shielding of virions by CHK-152 at neutral pH.** (a) Inhibition of nonspecific binding to a  
94 planar membrane. Fluorescently labeled CHIK virions were incubated with CHK-152, flown into a  
95 flow cell and docked to a planar membrane (see text). The number of particles binding to the  
96 membrane after rinsing the channel was counted and normalized to the mean number of particles in  
97 the absence of antibody. Single trials shown on log-log scale ( $n = 25$ ); blue line indicates a power-law  
98 fit with power coefficient  $-0.5 \pm 0.2$ . (b) Shielding of surface proteins from enzymatic cleavage. [35S]-

99 methionine/L-[35S] cysteine labeled CHIKV was incubated with CHK-152 and mixed with liposomes  
100 at neutral pH. The mixture was trypsinized for 1 h and subjected to SDS-PAGE analysis. CHK-152  
101 concentration in final volume: +, 0.63 nM CHK-152 in estimated ratio of 13 to virions; ++, 10 nM  
102 CHK-152 in ratio of 210 to virions. Representative image out of 3 trials shown.

103 We found that nonspecific binding reduced with increasing concentration of CHK-152 during the  
104 pre-incubation phase, as indicated by the fit of a power function (linear on log-log scale).

105 Interestingly, we also found that CHK-152 shields the E2 surface glycoprotein from enzymatic  
106 cleavage by trypsin (Figure 1b). Radiolabeled CHIKV was mixed with liposomes at neutral pH and  
107 subjected to trypsin digestion and SDS-page analysis. Trypsin completely digested the E1 and E2  
108 proteins, while pre-incubation with increasing concentrations of CHK-152 protected the E2 protein  
109 from trypsin digestion, indicating that E2 proteins were shielded against enzymatic cleavage.

110 Collectively, these results suggest that the CHIKV membrane interaction at neutral pH is reduced due  
111 to steric hindrance caused by the CHK-152 antibody.

#### 112 **CHK-152 blocks interaction with target membranes at low pH**

113 At low pH, the viral fusion proteins undergo conformational changes to support membrane  
114 fusion. Antibodies have been described that prevent the conformational changes that are required  
115 for membrane fusion or that freeze virus particles in an intermediate stage (Jin et al., 2015, Fox et  
116 al., 2015, Kaufmann et al., 2010, Selvarajah et al., 2013, Smith et al., 2015). We described before that  
117 CHK-152 abolishes membrane fusion activity at high antibody concentration in a liposomal fusion  
118 assay (Pal et al., 2013). There, we investigated the effect of CHK-152 on CHIKV fusion and revealed  
119 that both the extent as well as the rate of fusion decreases with increasing antibody concentrations  
120 (Pal et al., 2013, van Duijl-Richter, 2016). At 10 nM CHK-152, membrane fusion was almost  
121 completely abolished.

122 To further dissect the role of CHK-152 on membrane fusion, we here determined the low-pH  
123 dependent binding properties of the virus to liposomes in the presence or absence of CHK-152, by  
124 use of a liposomal co-floatation assay (Figure 2a).

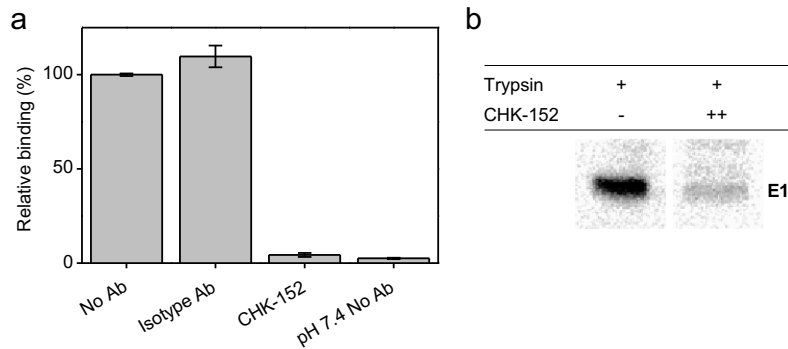

125

126 **Figure 2 CHK-152 inhibition of target membrane interaction at low pH.** (a) Inhibition of E1-  
127 liposome interaction at low pH. A fusion experiment was performed, adding radiolabeled CHIKV that  
128 was pre-incubated without, or with 10 nM of isotype control or CHK-152 antibodies to liposomes  
129 and acidifying the mixture to pH 5.1. After 1 min, the sample was neutralized and added to the  
130 bottom of a sucrose gradient and centrifuged. The relative radioactivity in the top fractions,  
131 therefore co-floating with the liposomes, was determined in triplicate and is plotted as mean±sem.  
132 (b) Inhibition of formation of trypsin-resistant E1 trimer. Radiolabeled CHIKV was incubated with or  
133 without CHK-152 for 10 min at 37 °C, added to liposomes and acidified to pH 5.1. After 1 min, the  
134 sample was neutralized to pH 8.0. The sample was incubated with 0.25% β-ME for 30 min at 37 °C ,  
135 trypsinized for 1 h and subjected to SDS-PAGE analysis. CHK-152 concentration at incubation: ++,  
136 20 nM CHK-152 in ratio of 335 to virions. Representative image out of 3 experiments is shown.

137 Radiolabeled CHIKV pre-incubated with 10 nM CHK-152 was added to liposomes after which the  
138 mixture was acidified to pH 5.1 for 1 min and back-neutralized to pH 8.0. A sucrose density column  
139 was formed from a layer of 60% (w/v) sucrose, then the sample mixed with 50% sucrose, and on top  
140 of that 20% and 5% layers. Upon ultracentrifugation, liposome-bound virus particles are at the 5–  
141 20%-layer interface, whereas unbound particles remain within the 50% sucrose layer. The  
142 radioactivity counts were determined, providing a measure of virus co-floating with, and therefore  
143 bound to, the liposomes. In the absence of antibodies, on average 55% binding was observed that  
144 was set to 100%. Comparable virus-liposomes binding was observed in the presence of an isotype  
145 antibody. Importantly, however, virus-liposome binding was completely abolished in presence of  
146 CHK-152 antibodies. This observation suggests that CHK-152 prevents stable interaction of E1 to  
147 liposomes and as a consequence no membrane fusion is observed.

148 To investigate if CHK-152 indeed blocks the low-pH induced conformational changes that are  
149 required for membrane fusion, we assessed the formation of a trypsin-resistant form of E1 under  
150 low-pH conditions (Figure 2b). It is known that the E1 homotrimer of alphaviruses that is formed

151 upon low-pH treatment is resistant to trypsin digestion (Kielian, Helenius, 1985). The trypsin-  
152 resistant E1-trimer dissociates into monomers when boiled in SDS sample buffer and can be  
153 detected with SDS-PAGE analysis. CHK-152-opsonized, radiolabeled CHIKV was incubated with  
154 liposomes at pH 5.1 as described for the liposome-binding assay (also see Methods). After back-  
155 neutralization to pH 8.0, the acidified liposome-CHIKV mixture was incubated with the reducing  
156 agent  $\beta$ -mercaptoethanol for 30 min in order to make the proteins more accessible to trypsin  
157 cleavage. The sample was then subjected to trypsin digestion. As expected, in the absence of CHK-  
158 152, a clear trypsin-resistant E1-band is seen. In presence of 20 nM CHK-152, however, the  
159 formation of the trypsin-resistant form of E1 was markedly reduced. Collectively, these observations  
160 suggest that high concentrations of CHK-152 either freeze the particle in the original state or  
161 interfere with an early step in the membrane fusion process i.e. at a step prior to stable interaction  
162 of E1 with the target membrane.

### 163 **The single-particle assay**

164 We established that CHK-152 blocks efficient membrane interaction both at neutral and low pH  
165 at high antibody concentrations. At lower antibody concentrations, however, CHIKV was able to bind  
166 to planar bilayers (Figure 1a) and we aimed to elucidate if at these conditions CHK-152 is able to  
167 directly interfere with membrane fusion, and if so, to determine the stoichiometry of CHK-152  
168 mediated neutralization of membrane fusion. To this end, we employed a single-particle assay with  
169 fluorescently tagged CHK-152, enabling counting of the number of CHK-152 bound to the individual  
170 viral particles. The single-particle assay relies on a controlled in vitro environment that enables  
171 synchronized acidification to initiate fusion and uses fluorescent tags to correlate the rate and  
172 extent of fusion to antibody binding.

173 The essentials of the single-particle assay are illustrated in Figure 3. The features were similar to  
174 those described before (van Duijl-Richter et al., 2015, Otterstrom et al., 2014). The basis is an in vitro  
175 flow cell system that allows rapid acidification of virions that are pre-docked onto a planar lipid



176 bilayer (Figure 3a), monitoring at the same time for every particle the occurrence of hemifusion and  
177 the number of antibodies present. As described above, a planar lipid bilayer was formed on a  
178 hydrophilic coverslip in a flow cell. A biotinylated lipid provided an anchor for fluorescein-labeled  
179 streptavidin to report on the change in local pH. CHIKV particles were membrane-labeled with the  
180 lipophilic dye R18, incubated at 37 °C with or without antibody, and flown into the flow cell to dock  
181 nonspecifically to the bilayer. After acidification, hemifusion was observed as the escape of R18 from  
182 the viral membrane into the target bilayer (Figure 3b), and the time from pH drop to hemifusion was  
183 determined.

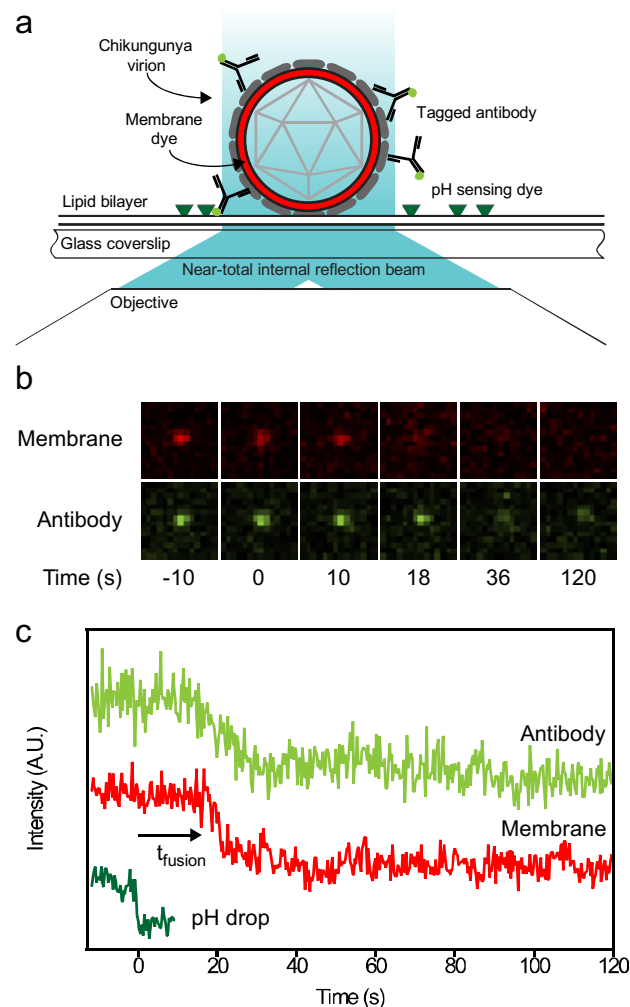

184

185 **Figure 3 Single-particle assay.** (a) In a flow channel, a lipid bilayer was formed on a cover glass.  
186 Viruses were labeled with lipophilic dye R18 and docked nonspecifically. A pH-sensitive dye attached  
187 to the membrane reported on pH change in the channel. Antibodies were detected and counted  
188 through a fluorescent tag. Fluorescence was excited by laser beams leaving the coverslip at a small  
189 angle. Fluorescence was split and projected onto different halves of a camera, allowing

190 colocalization of the viral membrane and antibody spots. (b) Examples of observed fluorescence  
191 (membrane and antibody) of the same virus particle. Hemifusion can be seen around 16 s after  
192 acidification as escape of the membrane dye into the target bilayer. Loss of antibody intensity is also  
193 observed. (c) Intensity information collected from the virus particle in panel b. Top trace shows the  
194 loss of antibodies over time after acidification. Middle trace shows the membrane intensity signal.  
195 The lower trace shows the disappearance of fluorescence of the fluorescein pH probe, defining the  
196 start of the experiment. The time to hemifusion, defined as the onset of signal dissipation, is  
197 indicated as  $t_{\text{fusion}}$ .

#### 198 **CHK-152 blocks and slows down fusion of pre-docked virions in a pH-dependent manner**

199 To correlate the effect of CHK-152 to different fusion conditions, we determined the fusion  
200 extent and time to fusion at pH 6.2, 6.1, 5.1 and 4.7. The latter two pH points lie in the optimal  
201 regime of fusion, and the first two around the threshold of fusion activation (see Figure 4– Figure  
202 supplement 1 and (van Duijl-Richter et al., 2015)). Measurements at pH 6.2 and 6.1 are in the pH  
203 range of early endosomes from which CHIKV particles have been described to fuse (Hoornweg et al.,  
204 2016). We studied fusion at room temperature; the rate of fusion scaled in an Arrhenius-like fashion  
205 over the range 37 °C to room temperature as determined with the liposomal fusion assay described  
206 above (Figure 4– Figure supplement 2). The extent of fusion, the fraction of the particle population  
207 that undergoes hemifusion within 2 min after acidification, is shown in Figure 4a.

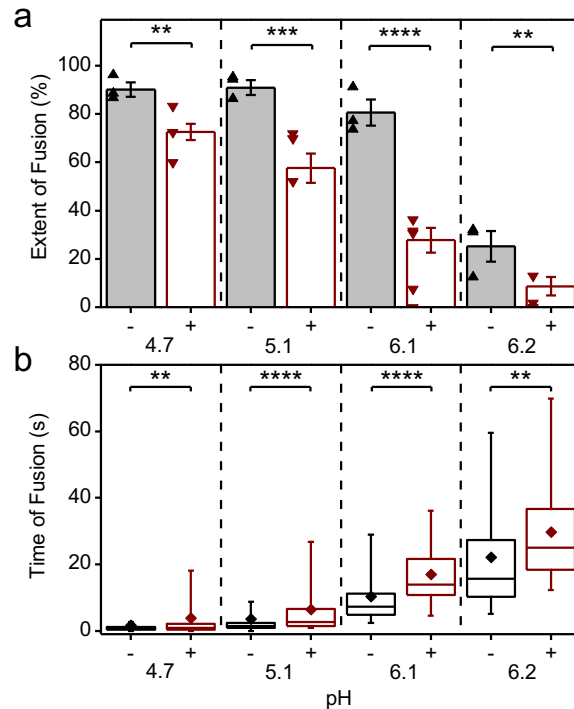

208

209 **Figure 4 Inhibition and slow-down of CHIKV fusion by CHK-152, in a pH-dependent manner.**  
 210 (a) Virions pre-docked to the planar bilayer were acidified to the pH-point indicated below the x-axis,  
 211 either with (+) or without (-) pre-incubation with CHK-152. The extent of fusion, the fraction of the  
 212 population undergoing fusion, is shown. Mean±sem shown together with single experiments  
 213 (triangles): black/-, without CHK-152, red/+, with pre-incubation of 0.63 nM CHK-152, resulting in  
 214  $52 \pm 3$  CHK-152 bound (see text). Significances determined by weighted t-test. (b) Time of hemifusion  
 215 of single particles with the same color coding of conditions as panel a. Means, diamonds; box plots,  
 216 5%-Q1-median-Q3-95% intervals. Significance of difference of medians determined by Wilcoxon  
 217 rank-sum test. Obtained p-values (Figure 4– Table supplement 1) \*\*:  $p < 0.01$ , \*\*\*:  $p < 0.001$ ,  
 218 \*\*\*\*:  $p < 0.0001$ . pH 6.1 and 6.2 lay at the threshold of fusion (Figure 4– Figure supplement 1). Fusion  
 219 was studied at room temperature as the rate of fusion scaled in an Arrhenius-like fashion over the  
 220 range 37 °C to room temperature as determined with the liposomal fusion assay (Figure 4– Figure  
 221 supplement 2). Figure 4– Figure supplement 3 details the CHK-152 numbers bound and shows no  
 222 correlation between the starting number of CHK-152 and the fate of fusion. There was some  
 223 antibody-induced virion aggregation and therefore virions with high antibody counts were filtered  
 224 out (Figure 4– Figure supplement 4 and Methods). Figure 4– Movie supplements 1 through 8 show  
 225 representative timelapses of each condition.

226 Fusion was highly efficient, with experiments showing up to 96% extent of fusion. As previously  
 227 observed for the S27 strain (van Duijl-Richter et al., 2015), the LR2006-OPY1 strain exhibited a sharp  
 228 pH threshold between pH 6.2 and 6.1, with the extent of fusion reduced by half over a pH difference  
 229 of 0.1. The time to hemifusion of single particles is shown in Figure 4b and shows that the time to  
 230 fusion is longer with higher pH.

231       CHK-152 was labeled with AlexaFluor488 to enable quantification of the copy number bound to  
232 single virions. To this end, both the intensity of single, tagged CHK-152 and the unlabeled fraction of  
233 antibody were determined (Methods). Because CHK-152 incubation induced some amount of virion  
234 aggregation, we analyzed 75% of the virus particles, those with the lowest antibody counts (more  
235 details in Methods). CHIKV was incubated with 0.63 nM of tagged CHK-152 for 15 min at 37 °C to  
236 allow binding to occur. This concentration resulted in an average of  $52 \pm 3$  antibodies bound per  
237 virion with minor preparational variation per pH condition (Figure 4– Figure supplement 3a). This  
238 number corresponds to 22–43% of the 240 epitopes bound depending on the valency of CHK-152  
239 binding (see Discussion). Under all conditions, this number of bound CHK-152 reduced the total  
240 extent of fusion (Figure 4a), indicating that CHK-152 directly blocks fusion at concentrations leading  
241 to sub-maximum epitope occupancy. The largest relative inhibition was observed at the threshold  
242 pH of 6.1 and 6.2. In addition to a reduction in extent, fusion was slowed down significantly under all  
243 pH conditions (as tested on the medians, Figure 4b). There was no consistent correlation between  
244 fusion of particles and starting antibody count (Figure 4– Figure supplement 3b). This observation  
245 may indicate that only a small number of the CHK-152 bound determine the fate of fusion, a number  
246 small enough that it does not contribute a detectable correlation.

#### 247 **CHK-152 dissociates from viral particles at low pH**

248       We observed that at pH 4.7 and 5.1 the fusion inhibition was reduced compared to the pH 6.1  
249 and 6.2 conditions even though the initial binding levels of CHK-152 were similar (Figure 4– Figure  
250 supplement 3a). Hence, we decided to check the amount of CHK-152 bound to the virus particles  
251 over time. Figure 5a shows observed spots from single virions bound with fluorescently tagged CHK-  
252 152. After 2 min at pH 4.7, almost all fluorescence had disappeared from spots of non-fusing virions,  
253 indicating CHK-152 dissociation. In contrast, at pH 6.1 only marginal reduction of fluorescence was  
254 observed.

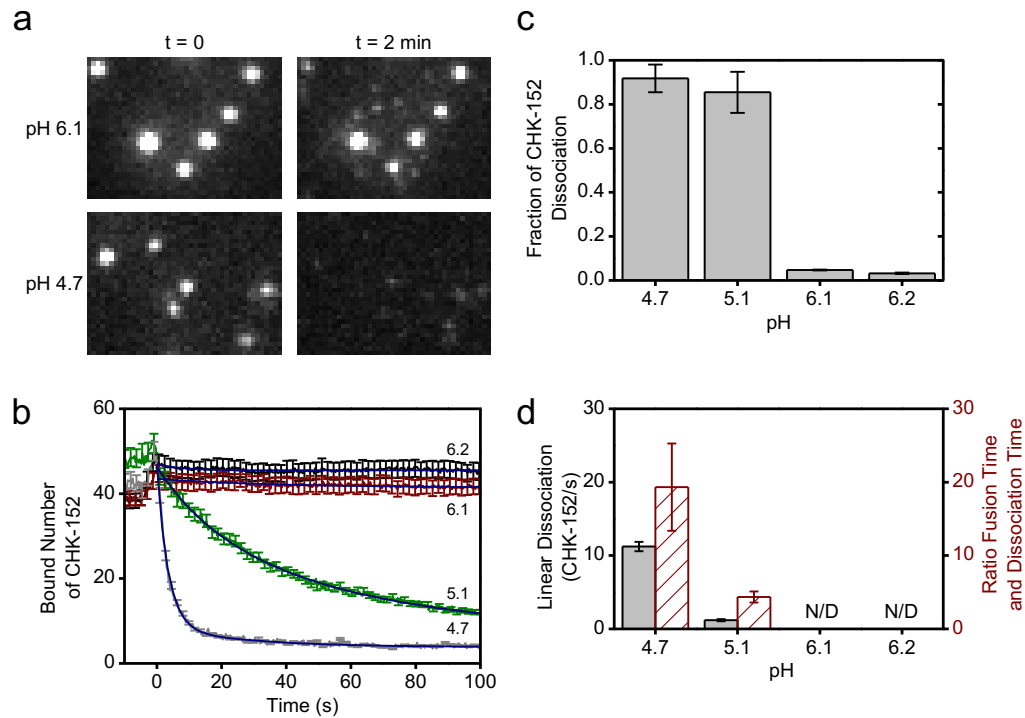

255

256 **Figure 5 CHK-152 dissociation at low pH.** (a) Fluorescent spots of CHK-152 bound to virions are  
 257 shown from a region of a movie slice for pH 6.1 and 4.7, and for  $t = 0$  and  $t = 2$  min. At pH 4.7, loss of  
 258 CHK-152 from the virions was observed after 2 min. Image heights correspond to  $8.5 \mu\text{m}$ . (b) The  
 259 average of bound CHK-152 of non-fusing virions is shown over time. Increase of signal towards  $t = 0$   
 260 was due to rolling and arrest of virus particles. One out of every five error bars shown to reduce  
 261 visual clutter. Blue lines show exponential fits (see text). (c) The final fraction of antibody remaining  
 262 for each pH point was determined from the fits in panel b. (d) The linear rate of dissociation at  $t = 0$   
 263 determined from the fits in panel b is shown per pH point in black (left y-axis). Red bars (right y-axis)  
 264 show the ratio of the mean fusion time without antibody (see Figure 4) to the dissociation time (the  
 265 inverse of the linear dissociation rate), at the pH points indicated. All error bars, sem. N/D: not  
 266 detectable. Confirmation of CHK-152 labeling in Figure 5– Figure supplement 1. Single CHK-152  
 267 intensity determination in Figure 5– Figure supplement 2 and Methods. The average of bound CHK-  
 268 152 of fusing virions is shown in Figure 5– Figure supplement 3.

269 The average bound number of CHK-152 over time was determined for fusing and non-fusing  
 270 particles separately (Figure 5b and Figure 5– Figure supplement 3). Time  $t = 0$  was defined by the  
 271 loss of fluorescence of the pH-sensitive fluorescein, and signals showed an initial increase towards  
 272  $t = 0$  due to the rolling and arrest of virions under the force of the inflowing low-pH buffer. Both  
 273 fusing and non-fusing virions displayed CHK-152 dissociation at pH 5.1 and 4.7. Because fusing  
 274 particles additionally lost CHK-152 after fusion due to diffusion (Figure 5a, top images) we decided to  
 275 take the number of CHK-152 bound to the non-fusing particles (Figure 5b) as a proxy for the  
 276 dissociation behavior of the whole population, as this indicates purely dissociation into solution.

277 As the fusion yields were slightly different for pH 5.1 and 4.7, we determined the properties of  
278 CHK-152 dissociation for both pH points. The curves showing the number of bound CHK-152 over  
279 time were fit with single-exponential (pH 6.2 and 6.1) and double exponential (pH 5.1 and 4.7) decay  
280 functions to extract the fraction of CHK-152 that ultimately dissociate (Figure 5c). Only marginal loss  
281 of antibody was observed at pH 6.2 and 6.1, whereas more than 80% of antibodies dissociated at  
282 pH 5.1 and 4.7. From the fits, the linear rate of dissociation at  $t = 0$  was determined for pH 5.1 and  
283 4.7 (Figure 5d, red), showing that pH 4.7 features an about 10-fold faster initial dissociation rate.  
284 Importantly, the ratio of the rates of fusion and rates of dissociation differed (Figure 5d, green): at  
285 pH 4.7, CHK-152 dissociation is about 10-fold faster than at pH 5.1, while the mean fusion time is  
286 only about 2-fold faster. The rate of dissociation may therefore explain the differences in extent of  
287 fusion at pH 5.1 and 4.7. We postulate fusion would be blocked with the starting CHK-152 counts  
288 (like at pH 6.1 and 6.2). However, due to sufficiently fast dissociation, compared to the timescale of  
289 the events leading to fusion and E1 protein inactivation, some virions become fusogenic again.  
290 Dissociation happens more quickly at pH 4.7 than at 5.1 relative to the events that lead to  
291 membrane fusion, thereby leading to a higher fusion extent. We therefore numerically modeled the  
292 process leading to the observed fusion extents, taking the CHK-152 stoichiometry and dissociation  
293 into account.

#### 294 **Antibody stoichiometry indicates high cooperativity at the level of E1/E2 spikes**

295 Binding of CHK-152 blocked and slowed down fusion. However, most epitopes were not bound  
296 with CHK-152, and at pH 4.7 CHK-152 dissociated very fast. To explain how small numbers of  
297 antibody can inhibit fusion, we devised a numerical model of fusion in which a single CHK-152 bound  
298 to an E2 surface epitope prevents the whole spike from participating in fusion. This model bears  
299 semblance to earlier work by us and others on influenza fusion inhibition (Otterstrom et al., 2014,  
300 Ivanovic, Harrison, 2015). Also, dissociation of all CHK-152 bound to the spike would restore that  
301 spike's fusogenicity, provided the dissociation happened rapidly enough compared to the fusion

302 timescale. The fusion extent was then numerically evaluated by assessing the availability of a  
303 sufficient number of unbound spikes that are in contact with the target membrane. Comparison of  
304 the results of this model to the observed stoichiometries and dissociation properties can then inform  
305 us on the cooperativity of CHIKV fusion at the spike level.

306 The key parameters in the model were the total number of spikes associated with the target  
307 membrane and the number of spikes that need to cooperatively act to mediate fusion. We  
308 considered different sizes for the contact patch in interaction with the target membrane,  
309 containing  $M$  proteins (Figure 6a). A spike was considered not to participate in mediating fusion if  
310 one or more of the three spike epitopes were bound by antibody (Figure 6b). Fusion could only be  
311 attained if a virus particle had a number  $N_H$  of unbound spikes within any 5- or 6-ring in its contact  
312 patch. Here,  $N_H = 1$  signifies fusion mediated by a single E1 trimer formed from an unbound spike,  
313 and for higher  $N_H$  fusion results from multiple unbound spikes in a ring on the viral surface  
314 (illustrated in Figure 6c). The positions of unbound spikes within the ring did not matter, as long as  
315 any ring in the contact patch contained  $N_H$  unbound spikes.

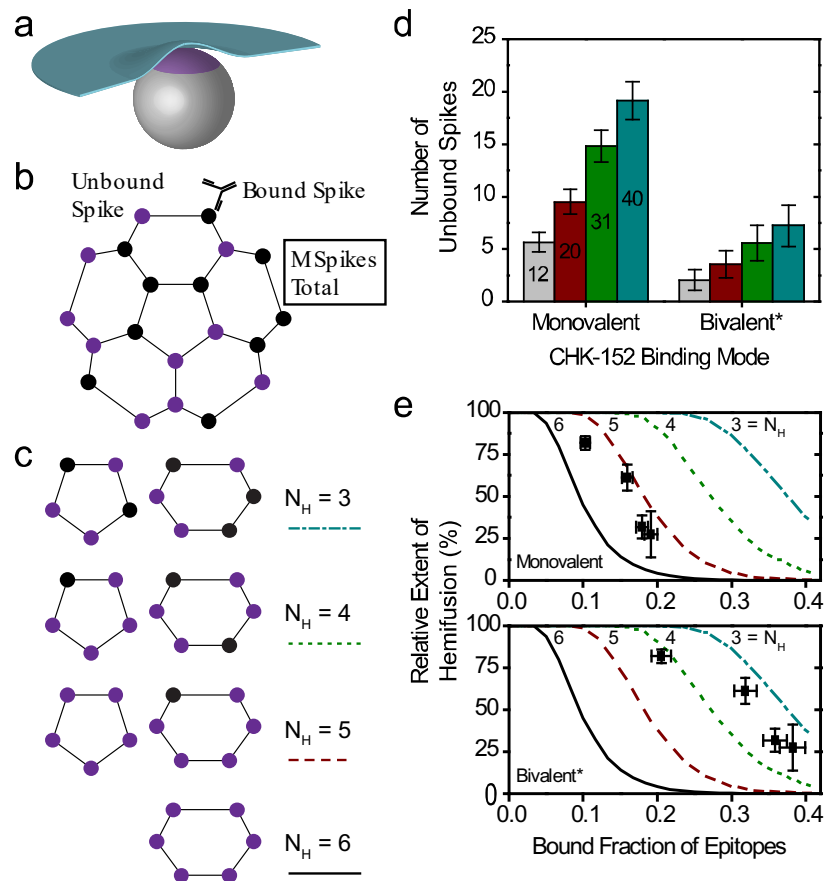

316

317 **Figure 6 Cooperative model of CHIKV fusion at the level of spikes.** (a) A virion (grey) docked to  
 318 the planar membrane (blue) is shown. The region in contact with the target membrane is shown in  
 319 purple: the contact patch. (b) The contact patch consists of  $M$  spikes, example of  $M = 20$  shown.  
 320 More details of the patch size are in Figure 6– Figure supplement 1. Unbound spikes (purple) are  
 321 considered to mediate fusion whereas spikes bound with one or more CHK-152 are considered not  
 322 to (black). (c) Cooperative fusion was modeled by the availability of a minimum number of unbound  
 323 spikes,  $N_H$ , in any of the 5- and 6-rings on the viral surface. The unbound positions can be anywhere  
 324 in the ring; examples for different  $N_H$  are shown. (d) For 10 000 virions  $52 \pm 3$  CHK-152 were randomly  
 325 bound per virion. Both the contact patch was varied (from 12 to 40) and the CHK-152 binding mode.  
 326 The mean  $\pm$  SE of the number of unbound spikes is shown. Bivalent\* binding was modeled as binding  
 327 by  $104 \pm 6$  monovalent Fabs. (e) For 10 000 virions CHK-152 was randomly bound as in panel d and  
 328 the relative extent of fusion was determined as the fraction of virions having available  $N_H$  free spikes  
 329 in a ring as defined in panel c. The extents of fusion from the simulations are shown as lines versus  
 330 the fraction of CHK-152-bound epitopes on the viral surface. Line legends are as shown in panel c:  
 331  $N_H = 3, 4, 5, 6$  are indicated by dash-dotted, dotted, dashed and a solid line respectively. The  
 332 experimental extent of fusion was determined relative to the no antibody control (Figure 6– Figure  
 333 supplement 2) and is plotted versus the time-averaged fraction of bound epitopes (black squares,  
 334 mean  $\pm$  sem). This time-average takes into account CHK-152 dissociation (see text and Figure 6–  
 335 Figure supplement 3). For panel e, different patch sizes and their influence on the best fit  
 336 parameters is shown in Figure 6– Figure supplements 4 and 5.

337 We considered the two extreme cases of the CHK-152 binding mode with its two Fab domains:

338 pure monovalent and pure bivalent binding. With a number of  $52 \pm 3$  antibodies bound over the



339 240 epitopes (in 80 spikes), the probability of a spike to be unbound is:  $p_{\text{unboundSpike}} = (1-52/240)^3$   
340 =  $0.48 \pm 0.03$  for monovalent binding, or  $p_{\text{unboundSpike}} = (1-104/240)^3 = 0.18 \pm 0.03$  for bivalent\* binding.  
341 We write bivalent\* binding, as this was estimated as binding of double the amount of monovalent  
342 Fabs. This is an unattainable maximum epitope occupancy, since bivalent antibodies can only bind  
343 neighboring epitopes and additionally will experience steric hindrance. Considering the probabilities  
344 calculated above, any contact patch of size  $M > 5$ , corresponding to greater than 6.25% of the virion  
345 surface, on average has more than 1 unbound spike in contact with the target membrane.

346 For a virion of 65 nm in diameter we estimate the contact patch to be 20 spikes, or 25% of the  
347 viral surface by looking at the range that the 13-nm-long E1 (Voss et al., 2010) may reach to a planar  
348 target membrane (Figure 6– Figure supplement 1a). Earlier work has similarly estimated the contact  
349 patch area of spherical, 50-nm diameter influenza viruses at 25% of the outer surface (Ivanovic et al.,  
350 2013). Here, the contact patch could be larger if inserting E1 were to pull the target membrane  
351 around the virion like a coat, or could be smaller due to steric hindrance of antibodies. In the  
352 biological context, the contact area with the inversely curved endosome may increase the contact  
353 patch. Therefore, we consider different sizes of  $M$  from 12 (about one eighth) to 40 (one half of a  
354 virion) as shown in Figure 6– Figure supplement 1b, which appear to be reasonable limits for the  
355 minimum and maximum contact patch size respectively. Then, we counted the number of unbound  
356 spikes in numerical simulations of the fusion. All tested patch sizes were determined to have  
357 multiple unbound spikes available on average (Figure 6d), in line with what we calculated above. We  
358 therefore considered a cooperative fusion mechanism.

359 First, we scaled the data to enable comparison with the numerical model. The extents of fusion in  
360 the presence of CHK-152 were calculated relative to the no-antibody condition, thereby correcting  
361 the extents for non-fusogenic virions and for the effect of pH on the total extent (Figure 6– Figure  
362 supplement 2). To correct for the dissociation of CHK-152 over time, we then calculated the effective  
363 number of CHK-152 bound to the virus particles during the time they fuse. We calculated this

364 effective number over the timescale of fusion, by averaging the number of CHK-152 bound to non-  
365 fusing virions over the population, and subsequently averaging over time weighted by the number of  
366 particles that have not yet fused (see Figure 6– Figure supplement 3). It is therefore an estimate of  
367 the average number of CHK-152 a fusing virion had bound during the time to fusion. The result is  
368 shown in Figure 6e (squares): the observed relative extents of fusion versus the estimated effective  
369 epitope occupancies in the cases of monovalent and bivalent\* binding.

370 Finally, we ran numerical simulations for 10 000 virions determining at each epitope occupancy  
371 what fraction of the virions had a ring containing  $N_H$  unbound spikes, defining the extent of fusion.  
372 The result is shown in Figure 6e as lines, for  $M = 20$ . We see that the data best matches fusion  
373 mediated by 3–5 unbound spikes in a ring (indicated by a red dashed and cyan dash-dotted line  
374 respectively), depending on CHK-152 binding valency. The cooperativity was largely determined by  
375 the valency of CHK-152 binding; the actual contact patch simulated was of minor effect (Figure 6–  
376 Figure supplement 4 and Figure 6– Figure supplement 5).

## 377 Discussion

378 Here, we reported on the mechanism of action of antibody CHK-152. We determined that it  
379 shields the virions at high concentrations of binding, preventing membrane interaction under  
380 neutral-pH as well as low-pH conditions. Using a single-particle fluorescence assay and a sub-  
381 stoichiometric ratio of CHK-152 binding, virions were pre-docked to a membrane. This approach  
382 allowed us to determine that CHK-152 also plays a role in directly blocking the fusion step. In this  
383 assay, CHK-152 was observed to dissociate at low pH, whereas it remained bound at mildly acidic pH.  
384 We devised a numerical model of CHIKV fusion with only E1 from unbound spikes able to trimerize  
385 and mediate fusion, and in which fusion is achieved by insertion of a minimal number of E1 trimers  
386 within a ring of neighboring spikes. Correcting for CHK-152 dissociation, the CHK-152 stoichiometries  
387 of binding were not consistent with fusion by single E1 trimers, but rather with fusion mediated by  
388 three to five trimers.

389 In addition to CHK-152 effectively preventing viral docking to membranes at neutral pH, it  
390 appears to directly block low-pH fusion by interfering with stable attachment of the virus to the  
391 target membrane. Our data and previous work indicate that prevention of virus attachment to the  
392 cell, possibly by sterically hindering receptor or membrane interaction, is an important mechanism in  
393 its neutralizing efficiency (Pal et al., 2013). We demonstrated that CHK-152 also directly inhibits  
394 fusion for pre-docked virions, at sub-saturated occupancy of binding. This enhances its potential as  
395 an antiviral by the multiplicative effect of binding reduction and fusion inhibition. It has been shown  
396 before that the CHK-152 Fab binds residues in the E2 A domain and the  $\beta$ -ribbon. The latter lies in  
397 the acid-sensitive region that becomes disordered at low pH, facilitating exposure of the E1 fusion  
398 loop (Voss et al., 2010, Li et al., 2010, Sun et al., 2013). As we find that CHK-152 prevents the  
399 formation of a trypsin-resistant form of E1, and inhibits stable association of E1 with target  
400 membranes, it seems plausible that CHK-152 inhibits E1 membrane insertion by blocking E1-E2  
401 heterodimer dissociation. However, it could also lock the E2 proteins in place allowing E1 membrane  
402 insertion but preventing trimerization, as observed in studies at threshold pH of 6.4 for Sindbis virus  
403 (Cao, Zhang, 2013). Interestingly, the acid-sensitive region and A and B domains appeared more  
404 often as binding targets for antibodies (Fox et al., 2015, Selvarajah et al., 2013, Smith et al., 2015).  
405 The epitope of neutralization lies within one single E2 molecule, in contrast with other, E2-  
406 crosslinking antibodies isolated for alpha- and flaviviruses (Jin et al., 2015, Fox et al., 2015, Kaufmann  
407 et al., 2010), so 'locking' the virion would require CHK-152 bivalent binding.

408 We observed CHK-152 dissociation at pH 5.1 and 4.7. In the in vitro conditions of our experiment,  
409 all unbound CHK-152 had been washed away so that CHK-152 dissociating after acidification  
410 effectively disappeared. This is in contrast with the liposomal fusion conditions (Pal et al., 2013) and  
411 an in-vivo situation, where CHK-152 might rebind from solution. Also, at the probed stoichiometry of  
412 binding in the single-particle assay, dissociation of just a couple of CHK-152 may restore virion  
413 fusogenicity. This would not be the case for higher concentrations of antibody incubation.  
414 Dissociation was marginal at pH 6.1 and 6.2, the pH of the early endosome through which CHIKV

415 enters cells (Hoornweg et al., 2016), and the extent of fusion was strongly reduced at these pH  
416 points. Also, the CHIKV strains so far have a sharp pH threshold and appear to be liable to acid-  
417 induced inactivation (van Duijl-Richter et al., 2015). In all, CHK-152 dissociation may not need to  
418 compromise its neutralization effectiveness in vivo even at sub-stoichiometric binding levels.

419 We found that the relative rate of CHK-152 dissociation determined the final extent of fusion for  
420 pH 4.7 and 5.1. However, at both pH points nearly all CHK-152 dissociated if given enough time.  
421 Together, this indicates that there is a “window of opportunity” during which the spikes must  
422 become unbound in order to still be able to mediate fusion again. Such a window of opportunity  
423 may arise for example due to inactivation of E1 proteins at low pH, as observed without the  
424 presence of target membranes (van Duijl-Richter et al., 2015). Even though the window of  
425 opportunity is an underlying, necessary assumption of our model, we did not explicitly model it as  
426 we just considered the average presence of CHK-152 for particles during the time they take to fuse.

427 Two different mechanisms of CHK-152 dissociation could be involved. In the first, the CHK-152  
428 lose affinity due to protonation changes in the epitope or paratope. This may involve an antibody-  
429 induced shift of the  $pK_a$  of protonatable residues on the protein, as suggested in Zeng et al (Zeng,  
430 Mukhopadhyay & Brooks, 2015). In the second, we see an analogue to how the influenza  
431 hemagglutinin has been modeled to overcome the kinetic barrier to rearrange to the post-fusion  
432 state by protonation (Zhang, Dudko, 2015). Here, the CHK-152 would raise the kinetic barrier for E2-  
433 E1 heterodimer dissociation. However, this increased barrier to conformationally rearrange is then  
434 overcome at sufficiently low pH, shedding the antibody. Identifying the dissociation mechanism is  
435 beyond this work as both described changes in CHK-152 and viral protein are proton-triggered.  
436 However, it appears important to determine if this mechanism is common in antibody-mediated  
437 neutralization of class II viruses, if it allows decreased-pH-threshold escape mutants to arise and if  
438 this could be avoided or exploited in rational antiviral design.

439 Employing the fusion-inhibiting capacity of CHK-152, we found CHIKV fusion to be cooperative by  
440 determining the stoichiometry of binding of CHK-152 and numerically simulating the resulting  
441 availability of CHK-152-free spikes on the virion surface. Fusion ensued when a sufficient number of  
442 unbound spikes were available to trimerize and together overcome the membrane fusion barriers. In  
443 this scenario, the E1 trimer fusion loops could associate to facilitate dimpling of both membranes, as  
444 detected before for the E1 ectodomain (Gibbons et al., 2004, Gibbons et al., 2003). The proposed  
445 mechanism is analogous to that developed for influenza viral fusion, where multiple protein trimers  
446 need to mediate fusion and the network of potentially cooperating trimers is disrupted by inhibitor  
447 binding (Otterstrom et al., 2014, Ivanovic, Harrison, 2015). Interestingly, in those studies, binding of  
448 an estimated quarter of epitopes resulted in significant fusion inhibition, similar to the occupancy  
449 probed here.

450 The combination of data and numerical model allowed to determine that CHIKV fusion is  
451 cooperative, but some uncertainties remain. To develop a more complete understanding of CHIKV  
452 fusion, it is necessary to probe a large range of inhibitor binding concentrations and obtain sufficient  
453 statistics to allow inference on the individual protein events to membrane fusion (for instance, the  
454 steps of heterodimer dissociation and E1 membrane insertion). The distribution of fusion times then  
455 allows inference on the underlying rate-determining steps (Ivanovic, Harrison, 2015, Chao et al.,  
456 2014, Kim et al., 2017). Here, we were limited to sub-stoichiometric levels of binding as CHK-152  
457 prevented nonspecific membrane docking at high binding levels, and the statistics were too limited  
458 to determine the fusion time distributions. The actual number of E1 trimers involved in fusion  
459 depended for the most part on the valency of the CHK-152 and less on the size of the contact patch.  
460 We point out two additional factors why CHIKV fusion is more cooperative than we could probe.  
461 First, the CHK-152 inhibited nonspecific docking, and virions may therefore have preferentially  
462 bound with a relatively sparsely CHK-152-covered section of the viral surface. The epitope occupancy  
463 in the contact patch is then relatively lower than on the rest of the particle, which implies a more  
464 cooperative fusion mechanism. Second, we see no reason a priori why E1 from different spikes

465 would be prevented from forming a trimer together. Compared to our model, this would further  
466 increase the number of E1 trimers that could form in the contact patch, thereby also implying a  
467 more cooperative mechanism.

468 Because of the reasons stated above, future studies should uncouple the binding- and fusion-  
469 inhibiting action of inhibitors by artificially coupling viruses to the membrane surface. Furthermore,  
470 using monovalent-binding Fab fragments eases interpretation of the data, and may reduce steric  
471 effects. Our results on alphavirus fusion fit in with a universal context found so far across all three  
472 classes of enveloped viruses, where fusion is mediated by multiple protein trimers in a close  
473 neighborhood (Ivanovic et al., 2013, Chao et al., 2014, Kim et al., 2017). Taken together, our data  
474 identifies important parameters to consider in the rational development of CHIKV antivirals.

## 475 **Materials and Methods**

476 CHIKV strain LR2006-OPY1 was a kind gift by Dr Andres Merits. Antibody CHK-152 was a kind gift  
477 from Dr Michael Diamond. All assays were performed at 37 °C, except the single-particle assay which  
478 was performed at room temperature (around 22 °C). The corresponding change in the rate of fusion  
479 was determined in the liposomal fusion assay described below (Figure 4– Figure supplement 2).  
480 Throughout this Chapter we refer to (hemi)fusion as fusion, as the assays used do not distinguish  
481 content mixing from lipid mixing. Appendix contains details of hypothesis testing (Figure 4– table  
482 supplement 1) and fitting (Figure 5– table supplement 1).

483 Virus – radiolabeled. A confluent layer of BHK-21 cells was infected at an MOI of 10. The virus  
484 inoculum was removed after 2.5 h incubation and following a 1.5 h starvation, 200 µCi (7.4 MBq)  
485 [35S]-methionine/L-[35S] cysteine using EasyTag™ EXPRESS35S Protein Labeling Mix (PerkinElmer,  
486 Groningen, the Netherlands) was added to the medium. Supernatant was harvested 20 hpi (hours  
487 post-infection) and layered on top of a two-step sucrose gradient (20%/50% w/v in HNE) and  
488 centrifuged for 2 h at 154 000 x g at 4 °C in a SW41 rotor (Beckman Coulter, Woerden, the

489 Netherlands) to clear from cell debris. Radioactive virus was collected at the 20%/50% sucrose  
490 interface and radioactivity was counted by liquid scintillation analysis. Fractions were pooled based  
491 on radioactivity counts. The infectivity of the virus preparation was determined by standard plaque  
492 assay on Vero-WHO cells and by qRT-PCR to determine the number of genome-containing particles,  
493 as described before (van Duijl-Richter et al., 2015).

494 Virus – fluorescently labeled, and inactivated. Virus stocks were prepared as described before  
495 (van Duijl-Richter et al., 2015). Briefly, CHIKV seed stocks were prepared by infection of Vero-WHO  
496 cells at a multiplicity of infection (MOI) of 0.01. Pyrene-labeled virus was produced in BHK-21 cells  
497 cultured beforehand in the presence of 15 µg/ml 1-pyrenehexadecanoic acid (Thermo Fisher  
498 Scientific, Waltham, MA, USA). The supernatant was harvested at 48 hpi, cleared from cell debris by  
499 low-speed centrifugation, purified by ultra-centrifugation and frozen in liquid nitrogen. Before  
500 freezing, the virus was UV-inactivated as the single-particle fusion assay was performed outside the  
501 BSL-3 facility (van Duijl-Richter et al., 2015). To produce octadecyl rhodamine B chloride (R18;  
502 Thermo Fisher Scientific)-labeled virions,  $7.2 \times 10^{12}$  particles of purified and inactivated CHIKV were  
503 diluted in PBS (10 mM phosphate, 140 mM NaCl, 0.2 mM EDTA) and 0.3 µL of 0.2 mM R18 dissolved  
504 in DMSO was added to a final concentration of 1 µM. Subsequently, the virus solution was kept on  
505 ice for 1 h. A gel-filtration column (PD-10 desalting column; GE Healthcare, Hoevelaken, the  
506 Netherlands) was used to separate the virus from unincorporated dye. The most concentrated  
507 fractions were combined and used in the experiment.

508 Liposomes. Liposomes were prepared as described before (van Duijl-Richter et al., 2015, Smit,  
509 Bittman & Wilschut, 1999). For the non-single-particle assays, the liposomes consisted of  
510 sphingomyelin from porcine brain, transphosphatidylated L-α-phosphatidylethanolamine (PE) from  
511 chicken egg, L-α-phosphatidylcholine (PC) and cholesterol from ovine wool. The lipids were mixed in  
512 a molar ratio of 1:1:1:1.5. The liposomes were prepared by freeze-thaw extrusion and extruded  
513 through a polycarbonate membrane with 200 nm pore. All lipids and the polycarbonate membrane

514 were purchased from Avanti Polar Lipids (Alabaster, Alabama, USA). Lipids and the phospholipid-to-  
515 cholesterol-ratio were chosen to approximate the lipid composition within the endosomal  
516 compartment (Kolter, Sandhoff, 2010, van Meer, Voelker & Feigenson, 2008). For the single-particle  
517 assay, liposomes (200 nm) were also prepared by freeze-thaw extrusion. Liposomes consisted of  
518 1:1:1:1.5:2×10<sup>-5</sup> ratio of 1,2-dioleoyl-sn-glycero-3-phosphocholine (DOPC), 1,2-dioleoyl-sn-glycero-3-  
519 phosphoethanolamine (DOPE), porcine brain sphingomyelin (SPM), ovine wool cholesterol and 1,2-  
520 dioleoyl-sn-glycero-3-phosphoethanolamine-N-(biotinyl) (Biotin-PE).

521 Trypsin cleavage of CHIKV structural proteins at neutral pH. [35S]-methionine/L-[35S] cysteine  
522 labeled CHIKV was incubated for 10 min at 37 °C with CHK-152 in HNE in the appropriate ratio. In  
523 final volume for the tested conditions: 0.63 nM CHK-152 in approximate ratio of 13 to virions, and  
524 10 nM CHK-152 in ratio of 210 to virions. Thereafter, liposomes were added at a final concentration  
525 of 200 µM at 37 °C in a total volume of 133 µL HNE buffer (5 mM HEPES, 150 mM NaCl, 0.1 mM  
526 EDTA) and kept for 60 s at pH 7.4. The mixture was digested with N-tosyl-L-phenylalanyl  
527 chloromethyl ketone (TPCK)-treated trypsin (Sigma-Aldrich, St. Louis, MO, USA) at a concentration of  
528 200 µg/mL in the presence of 1% Triton X-100. After 1 h at 37 °C, the samples were subjected to SDS-  
529 PAGE analysis.

530 Trypsin cleavage of E1 homotrimer at low pH. [35S]-methionine/L-[35S] cysteine labeled CHIKV  
531 was prior opsonized with CHK-152: 20 nM CHK-152 in ratio of 335 to virions. This was then mixed  
532 with 200 µM liposomes at 37 °C in a total volume of 133 µL HNE buffer (5 mM HEPES, 150 mM NaCl,  
533 0.1 mM EDTA). After 60 s of incubation, the pH was lowered to pH 5.1 by the addition of 7 µL of a  
534 pre-titrated buffer (0.1 M MES, 0.2 M acetic acid, NaOH to achieve desired pH). After 60 s, the mixture  
535 was neutralized to pH 8.0 by the addition of 3 µL of pre-titrated NaOH solution. Samples were  
536 incubated in 0.25% β-mercaptoethanol (β-ME) for 30 min and subsequently digested with TPCK-  
537 treated trypsin (Sigma) at a concentration of 200 µg/mL in the presence of 1% Triton X-100. Samples  
538 were then subjected to SDS-PAGE analysis.



539 SDS-PAGE analysis. Samples were solubilized by 4x SDS sample buffer (Merck-Millipore,  
540 Darmstadt, Germany) and analyzed by SDS-PAGE on 10% Mini-PROTEAN® TGX™ Precast Protein Gels  
541 (Biorad, Hercules, CA, USA). Gels were fixed in 1 M sodium salicylate for 30 min and dried. Viral  
542 protein bands were visualized in a Cyclone Plus Phosphor Imager (PerkinElmer) and radiographs  
543 were further analyzed using ImageQuant.

544 Liposomal binding assay. The influence of antibody binding of CHIKV on low-pH induced  
545 liposome-binding was assessed using a liposomal binding assay described before for SFV and SINV  
546 (Wahlberg et al., 1992, Smit, Bittman & Wilschut, 1999, Bron et al., 1993). Briefly, 0.75 µM viral  
547 phospholipid of [35S]-methionine/L-[35S]-cysteine labeled CHIKV particles was mixed with 200 µM  
548 liposomes in HNE buffer. The mixture was acidified by adding a pre-titrated amount of low pH buffer  
549 (0.1 M MES, 0.2 M acetic acid, NaOH to achieve desired pH). At 60 s after acidification, the mixture  
550 was neutralized to pH 8.0 by NaOH and placed on ice. 100 µL of this fusion reaction was added to  
551 1.4 mL of 50% sucrose in HNE (w/v). A sucrose density gradient was prepared consisting of 60%  
552 sucrose in HNE, followed by 50% sucrose in HNE including the fusion mixture, 20% sucrose in HNE  
553 and 5% sucrose in HNE on top. Gradients were centrifuged in a SW55 Ti rotor (Beckman Coulter) for  
554 2 h at 150 000 × g. The gradient was fractionated in ten parts and radioactivity in each fraction was  
555 determined by liquid scintillation analysis. The relative radioactivity in the top four fractions  
556 compared to total radioactivity in the gradient was taken as the measure for CHIKV that were bound  
557 to liposomes. For antibody-inhibition, [35S]-methionine/L-[35S]-cysteine labeled CHIKV was  
558 incubated for 10 min at 37 °C with 10 nM of CHK-152 in HNE before proceeding with a fusion  
559 measurement as described above.

560 Single-particle fusion – assay and microscopy. Experiments were performed at room temperature  
561 as reported before (van Duijl-Richter et al., 2015, Otterstrom et al., 2014). Glass microscope  
562 coverslips (24 mm x 50 mm, No. 1.5; Marienfeld brand, VWR, Amsterdam, the Netherlands) were  
563 cleaned using 30 min sonications in acetone and ethanol, followed by 10 min sonication with 1 M

564 potassium hydroxide and finally 30 min cleaning in an oxygen plasma cleaner. The last step was  
565 performed on the day of measurement. Polydimethylsiloxane (PDMS) flow cells with a channel  
566 cross-section of 0.1 mm<sup>2</sup> were prepared as before (Otterstrom et al., 2014). Imaging was performed  
567 with near-total internal reflection fluorescence microscopy (TIRF-M), using an inverted microscope  
568 (IX-71, Olympus, Leiderdorp, the Netherlands) and a high numerical aperture, oil-immersion  
569 objective (NA 1.45, 60×; Olympus). Liposomes were flushed into the flow cell and a planar lipid  
570 bilayer was allowed to form for >50 min. Virions were docked non-specifically to the lipid bilayer for  
571 3 min at 50 µL/min. Fluorescein-labelled streptavidin (Thermo Fisher Scientific) was introduced into  
572 the flow cell at 0.2 µg/mL for 5 min at 10 µL/min, as a pH drop proxy. Then, PBS with 2 mM Trolox  
573 ((±)-6-Hydroxy-2,5,7,8-tetramethylchromane-2-carboxylic acid, Sigma-Aldrich) was flown in for 2 min  
574 at 100 µL/min to remove unbound virions and fluorescein. The presence of Trolox prevented laser-  
575 intensity dependent fusion inactivation, presumably by reducing oxidative damage from the  
576 fluorescent dye. The aqueous environment was acidified by flowing in citric acid buffer (10 mM,  
577 140 mM NaCl, 0.2 mM EDTA) of pH 5.1 at 600 µL/min. The fluorophores were excited using 488 nm  
578 and 561 nm lasers (Sapphire, Coherent Inc., Santa Clara, CA, USA). Viral membrane fluorescence  
579 (red) and fluorescein pH drop fluorescence (green) were projected on different halves of an EM-CCD  
580 camera (C9100-13, Hamamatsu, Iwata-shi, Shizuoka-ken, Japan). Exposure time was 300 ms.  
581 Oponsonization was performed for 15 min at 37 °C with appropriate concentration of antibody and 10x  
582 diluted labeled virus, in final volume.

583 Antibody labeling and characterization. CHK-152 was labeled with AlexaFluor488 TFP-ester  
584 (Thermo Fisher Scientific) per manufacturer's guidance. UV-VIS spectroscopy indicated a labeling  
585 ratio of 1.5 dye/CHK-152. Tandem MALDI mass spectrometry was consistent with this (Figure 5–  
586 Figure supplement 1). MALDI was performed in 150 mM ammonium acetate, after dialysis. From the  
587 labeling ratio we estimated the fraction of unlabeled (i.e., not visualized) CHK-152 at 0.22, by  
588 assuming a Poissonian labeling distribution. To determine single CHK-152 intensity, labeled CHK-152  
589 was flown in at roughly picomolar concentration into a clean flowcell as described above. Imaging

590 conditions and buffers were the same as for virions (i.e. pH 5.1, unless noted otherwise). Single CHK-  
591 152 intensity was determined in a 7x7-pixel region, to be  $36 \pm 2$  A.U. per CHK-152 (Figure 5– Figure  
592 supplement 2a), corrected for background and laser intensity. Antibody fluorescence intensity was  
593 independent of pH (Figure 5– Figure supplement 2b).

594 Single-particle fusion – analysis. Home-written software in MATLAB was used to extract the  
595 fluorescence signals, essentially as described before (van Duijl-Richter et al., 2015, Otterstrom et al.,  
596 2014). In brief, the fluorescein pH-drop signal was integrated over the entire field of view and the  
597  $t=0$  of the experiment defined as the time point where only 8% of a fitted sigmoidal function  
598 remained. Particles fusion events and times were manually detected by inspecting the virion R18  
599 intensity traces together with the movie. CHK-152 fluorescence traces were extracted in a 7x7-pixel  
600 region, corrected for background, laser intensity and laser illumination profile, and divided by the  
601 intensity per CHK-152 and dark fraction as determined above, to yield the number of CHK-152  
602 bound. As we detected virion aggregation, presumably by antibody crosslinking, in both an increased  
603 R18 intensity distribution and a bimodal CHK-152 distribution (Figure 4– Figure supplement 4a and  
604 b), we only analyzed virions with up to 90 CHK-152 bound. These fell within a normally distributed  
605 portion of the population (Figure 4– Figure supplement 4b), in contrast with the lognormally  
606 distributed tail, and comprised 75% of the total number of virions observed.

607 Simulations. Numerical simulations were performed in Matlab. A grid of spikes was defined per  
608 Figure 6– Figure supplement 1b, where patch sizes from 12 to 40 (half a virion) were considered.  
609 Each spike contained 3 epitopes, and a specified number of inhibitors was bound randomly across all  
610 epitopes. This number of antibodies, or the related quantity epitope occupancy (number of  
611 antibodies divided by number of epitopes), was varied. Statistics were obtained for 10 000 virions.  
612 The number of unbound spikes within the contact patch was counted separately, and in the context  
613 of the defined 5- and 6-rings in Figure 6– Figure supplement 1b. The extent of fusion was defined as  
614 the fraction of virions that had at minimum one 5- or 6-ring with NH unbound spikes as shown in

615 Figure 6c. To facilitate comparison with the numerical model (Figure 6e), the data was scaled to take  
616 into account dissociation. Effective number of CHK-152 bound: the average number of CHK-152 over  
617 non-fusing virions was averaged over time weighted by the number of unfused virions. This is  
618 therefore a measure for the average number of CHK-152 a fusing virion had bound during the time it  
619 took to fuse. Relative extent of fusion: the extent of fusion in the presence of CHK-152 was divided  
620 by the extent of fusion without antibody. The relative extent of fusion therefore is corrected for  
621 virions that were never able to fuse, and for the pH variability of the fusion extent.

## 622 **Acknowledgements**

623 The authors wish to thank Dr Andres Merits and Dr Michael Diamond for their kind gifts of  
624 materials. We are grateful for technical assistance by Dr Viktor Krasnikov and the University of  
625 Groningen Workshop, and for the use of facilities of Dr E. Verpoorte with assistance of Patty Mulder.

## 626 **Competing interests**

627 None declared.

## 628 **References**

- 629 Ahn, A., Gibbons, D.L. & Kielian, M. 2002, "The fusion peptide of Semliki Forest virus associates with  
630 sterol-rich membrane domains", *Journal of virology*, vol. 76, no. 7, pp. 3267-3275.
- 631 Ashbrook, A.W., Burrack, K.S., Silva, L.A., Montgomery, S.A., Heise, M.T., Morrison, T.E. & Dermody,  
632 T.S. 2014, "Residue 82 of the Chikungunya virus E2 attachment protein modulates viral  
633 dissemination and arthritis in mice", *Journal of virology*, vol. 88, no. 21, pp. 12180-12192  
634 doi:10.1128/JVI.01672-14 [doi].
- 635 Bernard, E., Solignat, M., Gay, B., Chazal, N., Higgs, S., Devaux, C. & Briant, L. 2010, "Endocytosis of  
636 chikungunya virus into mammalian cells: role of clathrin and early endosomal compartments",  
637 *PLoS one*, vol. 5, no. 7, pp. e11479 doi:10.1371/journal.pone.0011479.
- 638 Bonizzoni, M., Gasperi, G., Chen, X. & James, A.A. 2013, "The invasive mosquito species *Aedes*  
639 *albopictus*: current knowledge and future perspectives ", *Trends in parasitology*, vol. 29, no. 9,  
640 pp. 460-468 doi:10.1016/j.pt.2013.07.003 [doi].
- 641 Bron, R., Wahlberg, J.M., Garoff, H. & Wilschut, J. 1993, "Membrane fusion of Semliki Forest virus in  
642 a model system: correlation between fusion kinetics and structural changes in the envelope  
643 glycoprotein", *The EMBO journal*, vol. 12, no. 2, pp. 693-701.

- 644 Cao, S. & Zhang, W. 2013, "Characterization of an early-stage fusion intermediate of Sindbis virus  
645 using cryoelectron microscopy", *Proceedings of the National Academy of Sciences of the United*  
646 *States of America*, vol. 110, no. 33, pp. 13362-13367 doi:10.1073/pnas.1301911110 [doi].
- 647 Centers for Disease Control and Prevention (CDC), *Geographic Distribution of Chikungunya Virus*.  
648 Available online: <https://www.cdc.gov/chikungunya/geo/index.html>.
- 649 Chao, L.H., Klein, D.E., Schmidt, A.G., Pena, J.M. & Harrison, S.C. 2014, "Sequential conformational  
650 rearrangements in flavivirus membrane fusion", *Elife*, vol. 3, pp. e04389  
651 doi:10.7554/eLife.04389.
- 652 Chernomordik, L.V. & Kozlov, M.M. 2008, "Mechanics of membrane fusion", *Nature Structural &*  
653 *Molecular Biology*, vol. 15, no. 7, pp. 675-683 doi:10.1038/nsmb.1455.
- 654 Clayton, A.M. 2016, "Monoclonal Antibodies as Prophylactic and Therapeutic Agents Against  
655 Chikungunya Virus", *The Journal of infectious diseases*, vol. 214, no. suppl 5, pp. S506-S509  
656 doi:10.1093/infdis/jiw324.
- 657 Floyd, D.L., Ragains, J.R., Skehel, J.J., Harrison, S.C. & van Oijen, A.M. 2008, "Single-particle kinetics of  
658 influenza virus membrane fusion", *Proceedings of the National Academy of Sciences of the*  
659 *United States of America*, vol. 105, no. 40, pp. 15382-15387 doi:10.1073/pnas.0807771105.
- 660 Fox, J.M., Long, F., Edeling, M.A., Lin, H., van Duijl-Richter, M.K.S., Fong, R.H., Kahle, K.M., Smit, J.M.,  
661 Jin, J., Simmons, G., Doranz, B.J., Crowe, J.E., Jr, Fremont, D.H., Rossmann, M.G. & Diamond,  
662 M.S. 2015, "Broadly Neutralizing Alphavirus Antibodies Bind an Epitope on E2 and Inhibit Entry  
663 and Egress", *Cell*, vol. 163, no. 5, pp. 1095-1107 doi:10.1016/j.cell.2015.10.050.
- 664 Gibbons, D.L., Erk, I., Reilly, B., Navaza, J., Kielian, M., Rey, F.A. & Lepault, J. 2003, "Visualization of  
665 the target-membrane-inserted fusion protein of Semliki Forest virus by combined electron  
666 microscopy and crystallography", *Cell*, vol. 114, no. 5, pp. 573-583 doi:10.1016/S0092-  
667 8674(03)00683-4.
- 668 Gibbons, D.L., Vaney, M.C., Roussel, A., Vigouroux, A., Reilly, B., Lepault, J., Kielian, M. & Rey, F.A.  
669 2004, "Conformational change and protein-protein interactions of the fusion protein of Semliki  
670 Forest virus", *Nature*, vol. 427, no. 6972, pp. 320-325 doi:10.1038/nature02239 [doi].
- 671 Harrison, S.C. 2015, "Viral membrane fusion", *Virology*, vol. 479, pp. 498-507  
672 doi:10.1016/j.virol.2015.03.043.
- 673 Hoornweg, T.E., van Duijl-Richter, M.K., Ayala Nunez, N.V., Albulescu, I.C., van Hemert, M.J. & Smit,  
674 J.M. 2016, "Dynamics of Chikungunya Virus Cell Entry Unraveled by Single-Virus Tracking in  
675 Living Cells", *Journal of virology*, vol. 90, no. 9, pp. 4745-4756 doi:10.1128/JVI.03184-15 [doi].
- 676 Ivanovic, T., Choi, J.L., Whelan, S.P.J., van Oijen, A.M. & Harrison, S.C. 2013, "Influenza virus  
677 membrane fusion by cooperative fold-back of stochastically induced hemagglutinin  
678 intermediates", *eLife*, vol. 2, no. 0, pp. e00333 doi:10.7554/eLife.00333.
- 679 Ivanovic, T. & Harrison, S.C. 2015, "Distinct functional determinants of influenza hemagglutinin-  
680 mediated membrane fusion", *eLife*, vol. 4, pp. e11009 doi:10.7554/eLife.11009.
- 681 Jin, J., Liss, N.M., Chen, D.H., Liao, M., Fox, J.M., Shimak, R.M., Fong, R.H., Chafets, D., Bakkour, S.,  
682 Keating, S., Fomin, M.E., Muench, M.O., Sherman, M.B., Doranz, B.J., Diamond, M.S. &  
683 Simmons, G. 2015, "Neutralizing Monoclonal Antibodies Block Chikungunya Virus Entry and  
684 Release by Targeting an Epitope Critical to Viral Pathogenesis", *Cell reports*, vol. 13, no. 11, pp.  
685 2553-2564 doi:10.1016/j.celrep.2015.11.043.
- 686 Jose, J., Snyder, J.E. & Kuhn, R.J. 2009, "A structural and functional perspective of alphavirus  
687 replication and assembly", *Future microbiology*, vol. 4, no. 7, pp. 837-856  
688 doi:10.2217/fmb.09.59 [doi].

- 689 Kaufmann, B., Vogt, M.R., Goudsmit, J., Holdaway, H.A., Aksyuk, A.A., Chipman, P.R., Kuhn, R.J.,  
690 Diamond, M.S. & Rossmann, M.G. 2010, "Neutralization of West Nile virus by cross-linking of its  
691 surface proteins with Fab fragments of the human monoclonal antibody CR4354 ", *Proceedings*  
692 *of the National Academy of Sciences of the United States of America*, vol. 107, no. 44, pp.  
693 18950-18955 doi:10.1073/pnas.1011036107 [doi].
- 694 Kielian, M. & Helenius, A. 1985, "pH-induced alterations in the fusogenic spike protein of Semliki  
695 Forest virus. ", *The Journal of cell biology*, vol. 101, no. 6, pp. 2284-2291.
- 696 Kielian, M. 2014, "Mechanisms of virus membrane fusion proteins", *Annual Review of Virology*, vol.  
697 1, pp. 171-189 doi:10.1146/annurev-virology-031413-085521.
- 698 Kim, I.S., Jenni, S., Stanifer, M.L., Roth, E., Whelan, S.P.J., van Oijen, A.M. & Harrison, S.C. 2017,  
699 "Mechanism of membrane fusion induced by vesicular stomatitis virus G protein", *Proceedings*  
700 *of the National Academy of Sciences of the United States of America*, vol. 114, no. 1, pp. E28-  
701 E36 doi:10.1073/pnas.1618883114.
- 702 Klimjack, M.R., Jeffrey, S. & Kielian, M. 1994, "Membrane and protein interactions of a soluble form  
703 of the Semliki Forest virus fusion protein", *Journal of virology*, vol. 68, no. 11, pp. 6940-6946.
- 704 Kolter, T. & Sandhoff, K. 2010, "Lysosomal degradation of membrane lipids", *FEBS letters*, vol. 584,  
705 no. 9, pp. 1700-1712 doi:10.1016/j.febslet.2009.10.021 [doi].
- 706 Li, L., Jose, J., Xiang, Y., Kuhn, R.J. & Rossmann, M.G. 2010, "Structural changes of envelope proteins  
707 during alphavirus fusion", *Nature*, vol. 468, no. 7324, pp. 705-708 doi:10.1038/nature09546  
708 [doi].
- 709 Nieva, J.L., Bron, R., Corver, J. & Wilschut, J. 1994, "Membrane fusion of Semliki Forest virus requires  
710 sphingolipids in the target membrane", *The EMBO journal*, vol. 13, no. 12, pp. 2797-2804.
- 711 Otterstrom, J.J., Brandenburg, B., Koldijk, M.H., Juraszek, J., Tang, C., Mashaghi, S., Kwaks, T.,  
712 Goudsmit, J., Vogels, R., Friesen, R.H.E. & van Oijen, A.M. 2014, "Relating influenza virus  
713 membrane fusion kinetics to stoichiometry of neutralizing antibodies at the single-particle  
714 level", *Proceedings of the National Academy of Sciences of the United States of America*, vol.  
715 111, no. 48, pp. E5143-E5148 doi:10.1073/pnas.1411755111.
- 716 Pal, P., Dowd, K.A., Brien, J.D., Edeling, M.A., Gorlatov, S., Johnson, S., Lee, I., Akahata, W., Nabel,  
717 G.J., Richter, M.K., Smit, J.M., Fremont, D.H., Pierson, T.C., Heise, M.T. & Diamond, M.S. 2013,  
718 "Development of a highly protective combination monoclonal antibody therapy against  
719 Chikungunya virus", *PLoS pathogens*, vol. 9, no. 4, pp. e1003312  
720 doi:10.1371/journal.ppat.1003312 [doi].
- 721 Pal, P., Fox, J.M., Hawman, D.W., Huang, Y.J., Messaoudi, I., Kreklywich, C., Denton, M., Legasse,  
722 A.W., Smith, P.P., Johnson, S., Axthelm, M.K., Vanlandingham, D.L., Streblow, D.N., Higgs, S.,  
723 Morrison, T.E. & Diamond, M.S. 2014, "Chikungunya viruses that escape monoclonal antibody  
724 therapy are clinically attenuated, stable, and not purified in mosquitoes", *Journal of virology*,  
725 vol. 88, no. 15, pp. 8213-8226 doi:10.1128/JVI.01032-14 [doi].
- 726 Reiter, P., Fontenille, D. & Paupy, C. 2006, "Aedes albopictus as an epidemic vector of chikungunya  
727 virus: another emerging problem?", *The Lancet. Infectious diseases*, vol. 6, no. 8, pp. 463-464  
728 doi:10.1016/S1473-3099(06)70531-X.
- 729 Rueden, C.T., Schindelin, J., Hiner, M.C., DeZonia, B.E., Walter, A.E., Arena, E.T. & Eliceiri, K.W.  
730 2017, "ImageJ2: ImageJ for the next generation of scientific image data", *BMC*  
731 *Bioinformatics*, vol. 18, no. 1, pp. 529 doi:10.1186/s12859-017-1934-z.
- 732 Schindelin, J., Arganda-Carreras, I., Frise, E., Kaynig, V., Longair, M., Pietzsch, T., Preibisch, S.,  
733 Rueden, C., Saalfeld, S., Schmid, B., Tinevez, J., White, D.J., Hartenstein, V., Eliceiri, K.,



- 734 Tomancak, P. & Cardona, A. 2012, "Fiji: an open-source platform for biological-image  
735 analysis", *Nature Methods*, vol. 9, pp. 676.
- 736 Selvarajah, S., Sexton, N.R., Kahle, K.M., Fong, R.H., Mattia, K.A., Gardner, J., Lu, K., Liss, N.M.,  
737 Salvador, B., Tucker, D.F., Barnes, T., Mabila, M., Zhou, X., Rossini, G., Rucker, J.B., Sanders, D.A.,  
738 Suhrbier, A., Sambri, V., Michault, A., Muench, M.O., Doranz, B.J. & Simmons, G. 2013, "A  
739 neutralizing monoclonal antibody targeting the acid-sensitive region in chikungunya virus E2  
740 protects from disease", *PLoS neglected tropical diseases*, vol. 7, no. 9, pp. e2423  
741 doi:10.1371/journal.pntd.0002423 [doi].
- 742 Smit, J.M., Bittman, R. & Wilschut, J. 1999, "Low-pH-dependent fusion of Sindbis virus with receptor-  
743 free cholesterol- and sphingolipid-containing liposomes", *Journal of virology*, vol. 73, no. 10, pp.  
744 8476-8484.
- 745 Smith, S.A., Silva, L.A., Fox, J.M., Flyak, A.I., Kose, N., Sapparapu, G., Khomadiak, S., Ashbrook, A.W.,  
746 Kahle, K.M., Fong, R.H., Swayne, S., Doranz, B.J., McGee, C.E., Heise, M.T., Pal, P., Brien, J.D.,  
747 Austin, S.K., Diamond, M.S., Dermody, T.S. & Crowe, J.E., Jr 2015, "Isolation and Characterization  
748 of Broad and Ultrapotent Human Monoclonal Antibodies with Therapeutic Activity against  
749 Chikungunya Virus", *Cell host & microbe*, vol. 18, no. 1, pp. 86-95  
750 doi:10.1016/j.chom.2015.06.009 [doi].
- 751 Smith, T.J., Cheng, R.H., Olson, N.H., Peterson, P., Chase, E., Kuhn, R.J. & Baker, T.S. 1995, "Putative  
752 receptor binding sites on alphaviruses as visualized by cryoelectron microscopy", *Proceedings of  
753 the National Academy of Sciences of the United States of America*, vol. 92, no. 23, pp. 10648-  
754 10652 doi:10.1073/pnas.92.23.10648.
- 755 Sun, S., Xiang, Y., Akahata, W., Holdaway, H., Pal, P., Zhang, X., Diamond, M.S., Nabel, G.J. &  
756 Rossmann, M.G. 2013, "Structural analyses at pseudo atomic resolution of Chikungunya virus  
757 and antibodies show mechanisms of neutralization", *eLife*, vol. 2, pp. e00435  
758 doi:10.7554/eLife.00435 [doi].
- 759 van Duijl-Richter, M.K.S. 2016, *Dengue and Chikungunya virus: Cell entry mechanisms and the impact  
760 of antibodies on infectivity*, University of Groningen [http://hdl.handle.net/11370/7c4c710d-  
761 0bb2-4b84-8040-4795a14e9ee7](http://hdl.handle.net/11370/7c4c710d-0bb2-4b84-8040-4795a14e9ee7).
- 762 van Duijl-Richter, M.K., Blijleven, J.S., van Oijen, A.M. & Smit, J.M. 2015, "Chikungunya virus fusion  
763 properties elucidated by single-particle and bulk approaches", *The Journal of general virology*,  
764 vol. 96, no. 8, pp. 2122-2132 doi:10.1099/vir.0.000144 [doi].
- 765 van Meer, G., Voelker, D.R. & Feigenson, G.W. 2008, "Membrane lipids: where they are and how  
766 they behave", *Nature Reviews Molecular Cell Biology*, vol. 9, no. 2, pp. 112-124  
767 doi:10.1038/nrm2330.
- 768 Voss, J.E., Vaney, M.C., Duquerroy, S., Vonrhein, C., Girard-Blanc, C., Crublet, E., Thompson, A.,  
769 Bricogne, G. & Rey, F.A. 2010, "Glycoprotein organization of Chikungunya virus particles  
770 revealed by X-ray crystallography", *Nature*, vol. 468, no. 7324, pp. 709-712  
771 doi:10.1038/nature09555 [doi].
- 772 Wahlberg, J.M., Boere, W.A. & Garoff, H. 1989, "The heterodimeric association between the  
773 membrane proteins of Semliki Forest virus changes its sensitivity to low pH during virus  
774 maturation", *Journal of virology*, vol. 63, no. 12, pp. 4991-4997.
- 775 Wahlberg, J.M., Bron, R., Wilschut, J. & Garoff, H. 1992, "Membrane fusion of Semliki Forest virus  
776 involves homotrimers of the fusion protein", *Journal of virology*, vol. 66, no. 12, pp. 7309-7318.
- 777 Weaver, S.C. & Forrester, N.L. 2015, "Chikungunya: Evolutionary history and recent epidemic  
778 spread", *Antiviral Research*, vol. 120, pp. 32-39 doi:10.1016/j.antiviral.2015.04.016.

- 779 Zeng, X., Mukhopadhyay, S. & Brooks, C.L.,3rd 2015, "Residue-level resolution of alphavirus  
780 envelope protein interactions in pH-dependent fusion", *Proceedings of the National Academy of  
781 Sciences of the United States of America*, vol. 112, no. 7, pp. 2034-2039  
782 doi:10.1073/pnas.1414190112 [doi].
- 783 Zhang, Y. & Dudko, O.K. 2015, "Statistical mechanics of viral entry", *Physical Review Letters*, vol. 114,  
784 no. 1, pp. 018104 doi:10.1103/PhysRevLett.114.018104.
- 785 Zheng, Y., Sanchez-San Martin, C., Qin, Z.L. & Kielian, M. 2011, "The domain I-domain III linker plays  
786 an important role in the fusogenic conformational change of the alphavirus membrane fusion  
787 protein", *Journal of virology*, vol. 85, no. 13, pp. 6334-6342 doi:10.1128/JVI.00596-11 [doi].



## 788 Supplements

### A. Yield of fusion (Figure 4a)

| Observable          | Yield of Hemifusion                     |                                |                    |
|---------------------|-----------------------------------------|--------------------------------|--------------------|
| Compared conditions | No antibody (1) vs. 0.63 nM CHK-152 (2) |                                |                    |
| Null hypothesis     | Equal means                             |                                |                    |
| Hypothesis test     | Two-sided weighted Student's t-test     |                                |                    |
| pH                  | Weights1 (number of particles)          | Weights2 (number of particles) | P-value            |
| 4.7                 | 83, 44, 54                              | 113, 10, 12                    | 0.001              |
| 5.1                 | 149, 248, 142                           | 25, 20, 113                    | $5 \times 10^{-4}$ |
| 6.1                 | 254, 227, 202                           | 164, 13, 13, 19, 11            | $2 \times 10^{-5}$ |
| 6.2                 | 249, 227, 270                           | 105, 185, 10                   | 0.01               |

### B. Time of fusion (Figure 4b)

|                     |                                          |  |  |
|---------------------|------------------------------------------|--|--|
| Observable          | Fusion time                              |  |  |
| Compared conditions | No antibody (1) vs. 0.63 nM CHK-152 (2)  |  |  |
| Null hypothesis     | Equal medians                            |  |  |
| Hypothesis test     | Two-sided Wilcoxon rank sum <sup>1</sup> |  |  |

<sup>1</sup> Reference: Nonparametric Hypothesis Testing: Rank and Permutation Methods with Applications in R, Bonnini et al.

| pH  | n1  | n2 | P-value |
|-----|-----|----|---------|
| 4.7 | 163 | 98 | 0.002   |
| 5.1 | 490 | 91 | 2E-11   |
| 6.1 | 550 | 61 | 3E-11   |
| 6.2 | 188 | 26 | 0.003   |

789 **Figure 4– Table supplement 1 Significance testing.**

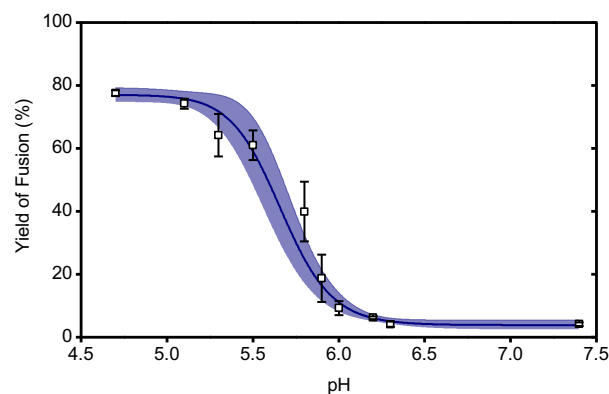

790

791 **Figure 4– Figure supplement 1 pH-dependence of the extent of fusion in a liposomal fusion**  
 792 **assay for the CHIKV LR2006 OPY1 strain.** Pyrene-labeled viruses were mixed with liposomes and  
 793 acidified to the indicated pH at 37 °C. The yield of fusion was determined as the amount of  
 794 fluorescence detected at 60 s relative to full dilution of the pyrene probe by detergent (see  
 795 Methods). A logistic curve was fitted to the data, 95% confidence intervals indicated.

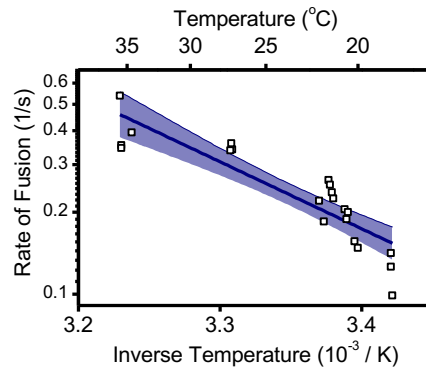

796

797 **Figure 4– Figure supplement 2 Arrhenius plot of the rate of fusion in a bulk liposomal fusion**  
 798 **assay versus the inverse temperature.** Pyrene-labeled viruses were mixed with liposomes and  
 799 acidified to pH 5.1 at the specified temperature. The rate of fusion was determined as the inverse of  
 800 the time to reach 50% of the maximum fusion extent (see Methods).  $N=21$  trials. Linear fit with 95%  
 801 confidence interval indicated.

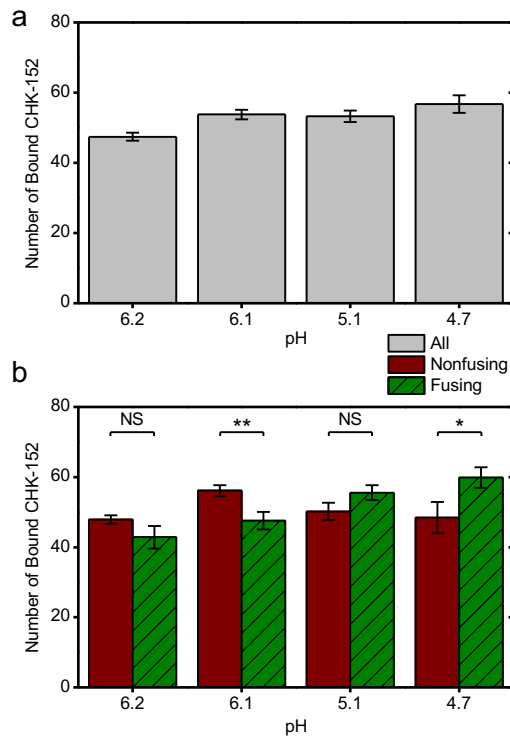

802

803 **Figure 4– Figure supplement 3 Number of CHK-152 bound at the start of the experiment per pH**  
 804 **condition.** As described in the Methods, the number of CHK-152 per virion was determined in the  
 805 single-particle assay at  $t = 0$ . These numbers are here shown as means for different subsets of all  
 806 virions. (a) All virions: number of CHK-152 bound at start for all particles taken together. (b) The data  
 807 as in panel a split into the subpopulations of viruses that fuse and those that do not. Significances  
 808 determined by t-test. \*  $p < 0.05$ , \*\*  $p < 0.01$ .

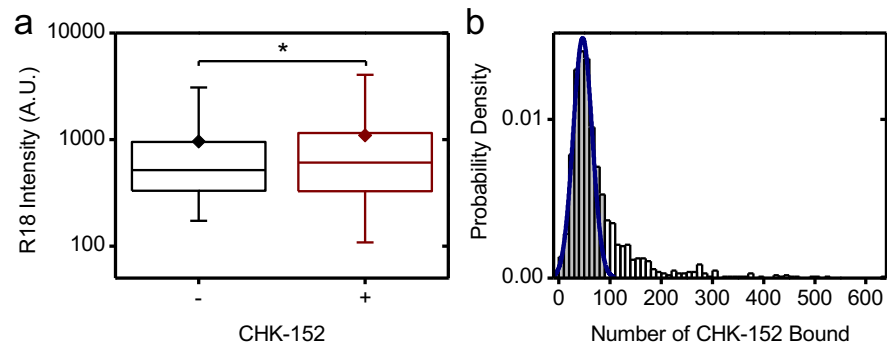

809

810 **Figure 4– Figure supplement 4 CHK-152-induced virion aggregation.** a) For virions docked to the  
811 planar bilayer at pH 7.4 the R18 intensity was determined and is shown on a log scale. Conditions:  
812 -, without CHK-152 and +, with CHK-152 pre-incubation. Significance determined by t-test on the  
813 means,  $n_- = 2149$  and  $n_+ = 1042$  virions. Means, diamonds; box plot shows 5%-Q1-median-Q3-95%  
814 intervals. b) Similarly, single-virion CHK-152 counts were determined at pH 7.4 and are shown in a  
815 histogram. Particles falling within the fitted Gaussian were selected for further analysis: the 75% of  
816 the data points with a CHK-152 count of up to 90 per virion.

817

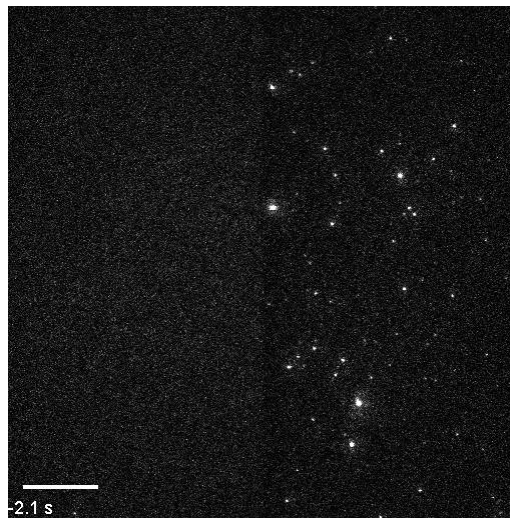

818 **Figure 4– Movie Supplement 1.** Single-particle CHIKV fusion at pH 4.7 without CHK-152. Scale bar  
819 20  $\mu\text{m}$ . Realtime timelapse. All timelapses

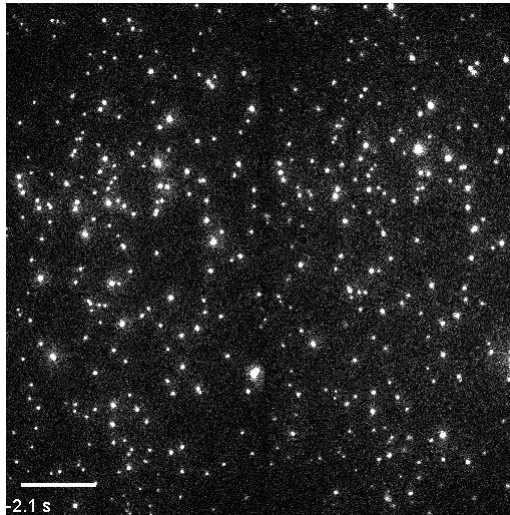

820

821 **Figure 4– Movie Supplement 2.** Timelapse of single-particle CHIKV fusion at pH 4.7 with CHK-152.  
822 Scale bar 20  $\mu\text{m}$ . Realtime timelapse.

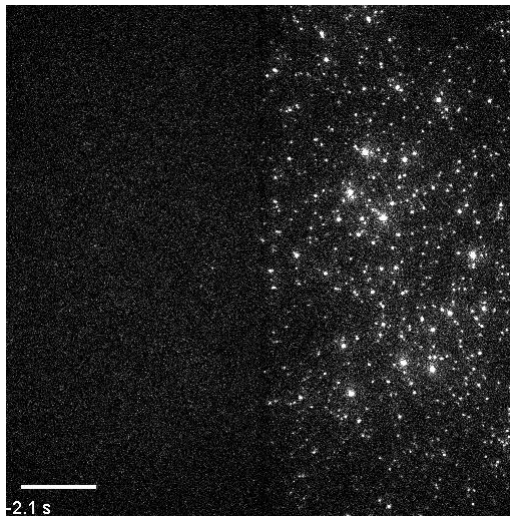

823

824 **Figure 4– Movie Supplement 3.** Timelapse of single-particle CHIKV fusion at pH 5.1 without CHK-  
825 152. Scale bar 20  $\mu\text{m}$ . Realtime timelapse.

826

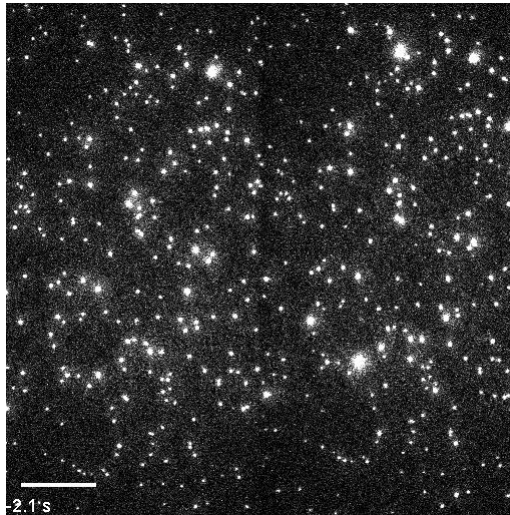

827

**Figure 4– Movie Supplement 4.** Timelapse of single-particle CHIKV fusion at pH 5.1 with CHK-152.

828

Scale bar 20  $\mu\text{m}$ . Realtime timelapse.

829

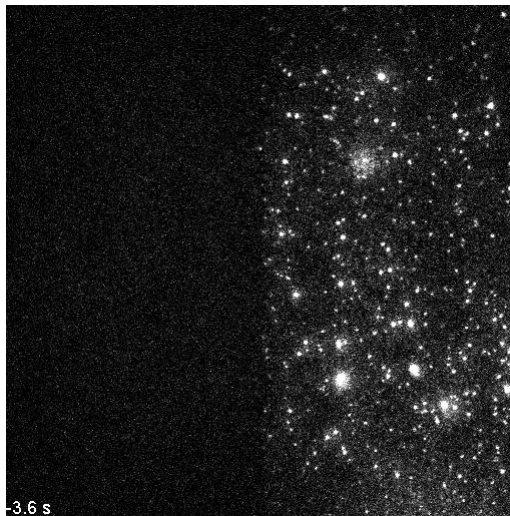

830

**Figure 4– Movie Supplement 5.** Timelapse of single-particle CHIKV fusion at pH 6.1 without CHK-

831

152. Scale bar 20  $\mu\text{m}$ . Timelapse at 3x speed.



832

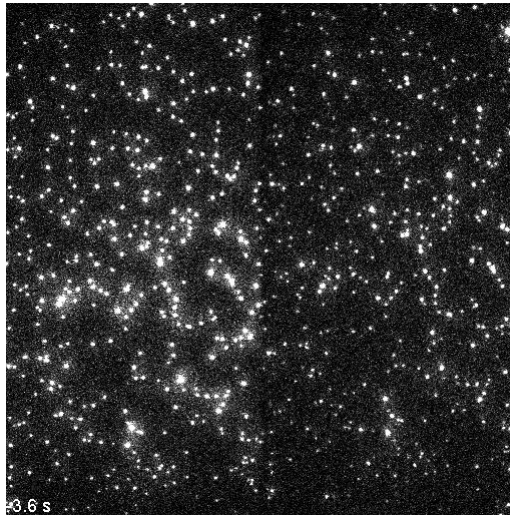

833 **Figure 4– Movie Supplement 6.** Timelapse of single-particle CHIKV fusion at pH 6.1 with CHK-152.

834 Scale bar 20  $\mu\text{m}$ . Timelapse at 3x speed.

835

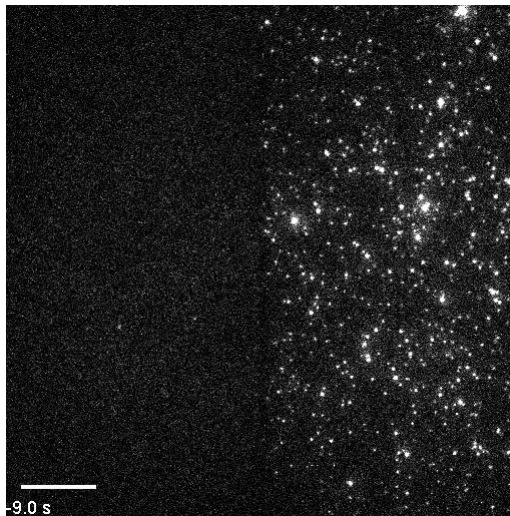

836 **Figure 4– Movie Supplement 7.** Timelapse of single-particle CHIKV fusion at pH 6.2 without CHK-

837 152. Scale bar 20  $\mu\text{m}$ . Timelapse at 5x speed.

838

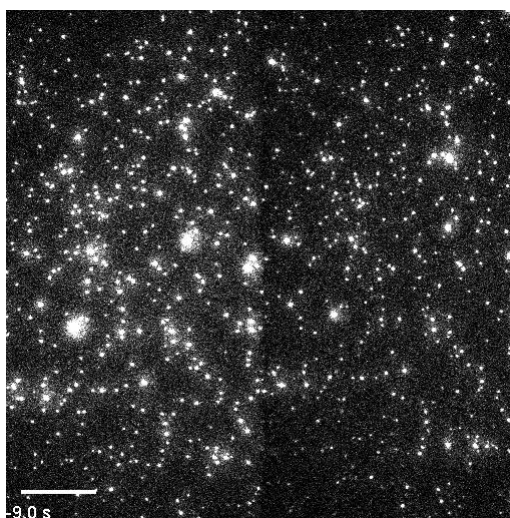

839 **Figure 4– Movie Supplement 8.** Timelapse of single-particle CHIKV fusion at pH 6.2 with CHK-152.  
840 Scale bar 20 μm. Timelapse at 5x speed.

Number of bound CHK-152 versus Time (Figure 5b)

Fit function:  $y = A1 * \exp(-x/t1) + y0$

| Parameter:      | pH: | 6.2              | 6.1              |
|-----------------|-----|------------------|------------------|
| Baseline $y0$   |     | $45.48 \pm 0.03$ | $41.45 \pm 0.08$ |
| Amplitude $A1$  |     | $1.5 \pm 0.1$    | $2.05 \pm 0.08$  |
| Time scale $t1$ |     | $8 \pm 1$        | $36 \pm 4$       |

Fit function:  $y = A1 * \exp(-x/t1) + A2 * \exp(-x/t2) + y0$

| Parameter:      | pH: | 5.1           | 4.7             |
|-----------------|-----|---------------|-----------------|
| Baseline $y0$   |     | $6.7 \pm 0.2$ | $3.83 \pm 0.03$ |
| Amplitude $A1$  |     | $27 \pm 2$    | $4.9 \pm 0.3$   |
| Time scale $t1$ |     | $59 \pm 3$    | $26 \pm 2$      |
| Amplitude $A2$  |     | $12 \pm 2$    | $38 \pm 2$      |
| Time scale $t2$ |     | $17 \pm 2$    | $3.4 \pm 0.2$   |

841 **Figure 5– Table supplement 1** Fitting functions used and resulting fit parameters.

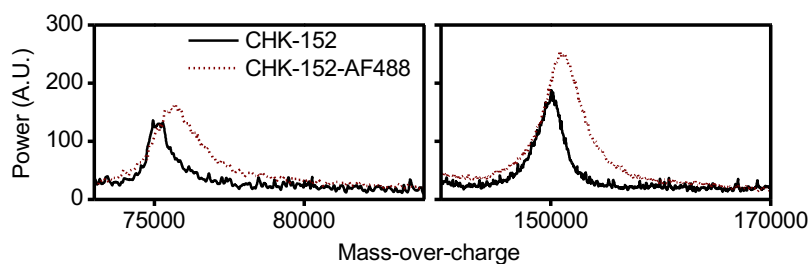

842

843 **Figure 5– Figure supplement 1** MALDI spectra of labeled and unlabeled CHK-152. Spectra were  
844 obtained with antibody dialyzed to 150 mM ammonium acetate. The AlexaFluor488 dye had a  
845 molecular weight of about 700.

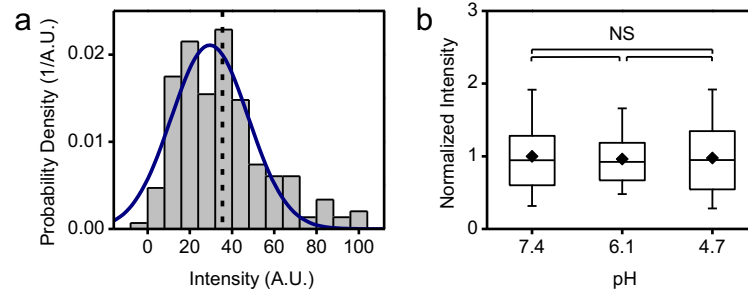

846

847 **Figure 5– Figure supplement 2 Labeled CHK-152 intensity determination.** (a) Single AF488-  
 848 labeled CHK-152 were flown into the flow cell and absorbed aspecifically to the cover glass at pH 7.4.  
 849 Imaging conditions as for a fusion experiment were then used to extract the single CHK-152-AF488  
 850 intensity. The histogram of intensities is shown for  $n=186$  spots. Solid line is a Gaussian fit, dashed  
 851 line shows mean value. (b) With conditions as in panel a, the intensities of CHK-152-AF488 versus pH  
 852 are shown, normalized to mean pH 7.4 intensity. Significances from t-test,  $n = 65,47,58$  spots  
 853 respectively. Means, diamonds; box plot shows 5%-Q1-median-Q3-95% intervals.

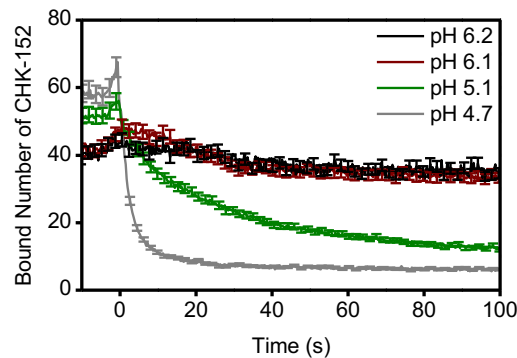

854

855 **Figure 5– Figure supplement 3 Bound number of CHK-152 averaged for all fusing particles over**  
 856 **time.** In the single-particle assay, the fluorescence intensity of virions was tracked over time and  
 857 converted to absolute number of CHK-152 bound (Methods). The average number of CHK-152  
 858 bound for fusing virions is shown over time. Increase of signal towards  $t = 0$  due to rolling and arrest  
 859 of virus particles. One out of every five error bars (sem) shown to reduce visual clutter.

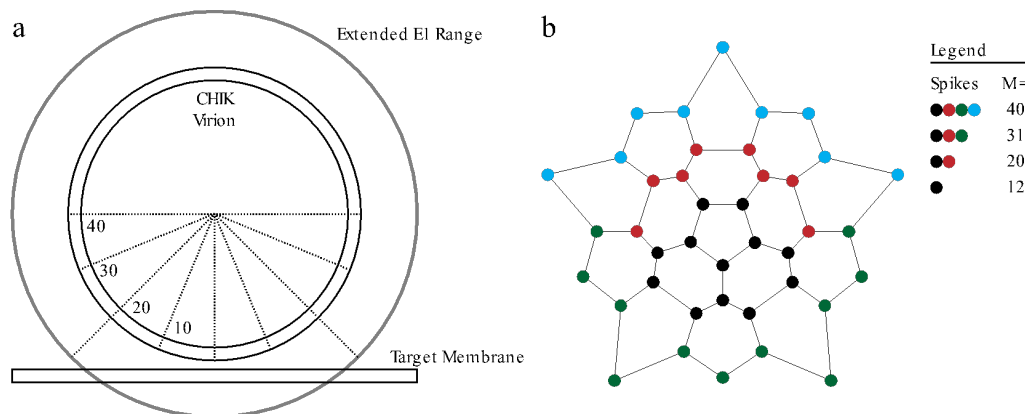

860

861 **Figure 6– Figure supplement 1 Patch size considerations.** (a) Schematic diagram of the number  
 862 of spikes that fall within range of the contact patch (delineated by dotted lines) facing the target  
 863 membrane. Virion of 65 nm diameter and E1 proteins of 13 nm length assumed (approximate range



864 shown in grey). The number of spikes is shown, that fits on the relative fraction of the viral surface  
865 indicated. In total the virion comprises 80 spikes. (b) Layout of the surface grid of spikes of one half  
866 of a CHIK virion. The lines indicate the connections that make rings. The different contact patch sizes  
867 are indicated by color, cumulatively:  $M = 12$  (black),  $M = 20$  (black+red),  $M = 31$  (black+red+green),  
868  $M = 40$  (black+red+green+blue).

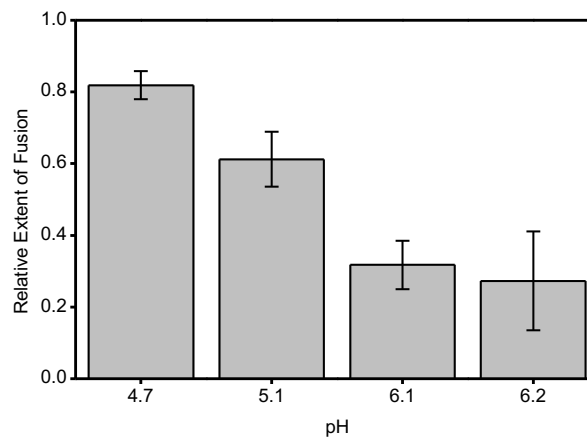

869

870 **Figure 6– Figure supplement 2 Relative extent of fusion with CHK-152 for each pH point.** The  
871 relative extent of fusion was calculated as the ratio of the extents of fusion of the antibody and no-  
872 antibody conditions (both from **Figure 4**). Sem was propagated accordingly.

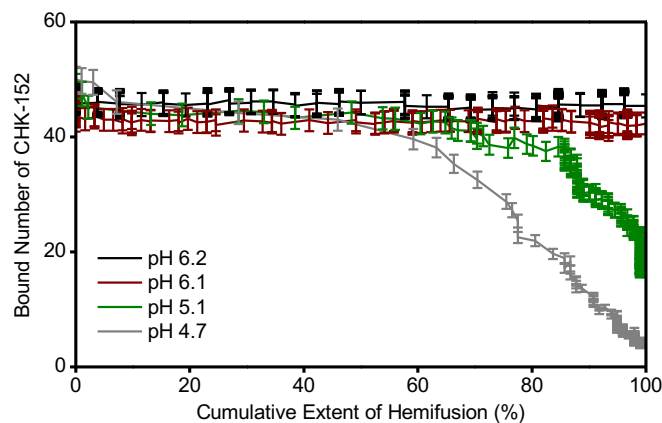

873

874 **Figure 6– Figure supplement 3 Correlation of the mean number of bound CHK-152 versus the**  
875 **cumulative extent of fusion.** Both the extent of fusion and CHK-152 number were determined over  
876 time for individual virions and then averaged. The two readouts are here plotted against each other  
877 for each time point. As is visible in Figure 5, at pH 6.2 and 6.1 only a small number of CHK-152  
878 dissociate, whereas at pH 5.1 and 4.7 dissociation occurs. The graph shows that at pH 5.1 and 4.7  
879 only late-fusing virions, with respect to the whole fusing population, have lost large numbers of CHK-  
880 152 at the moment of fusion.

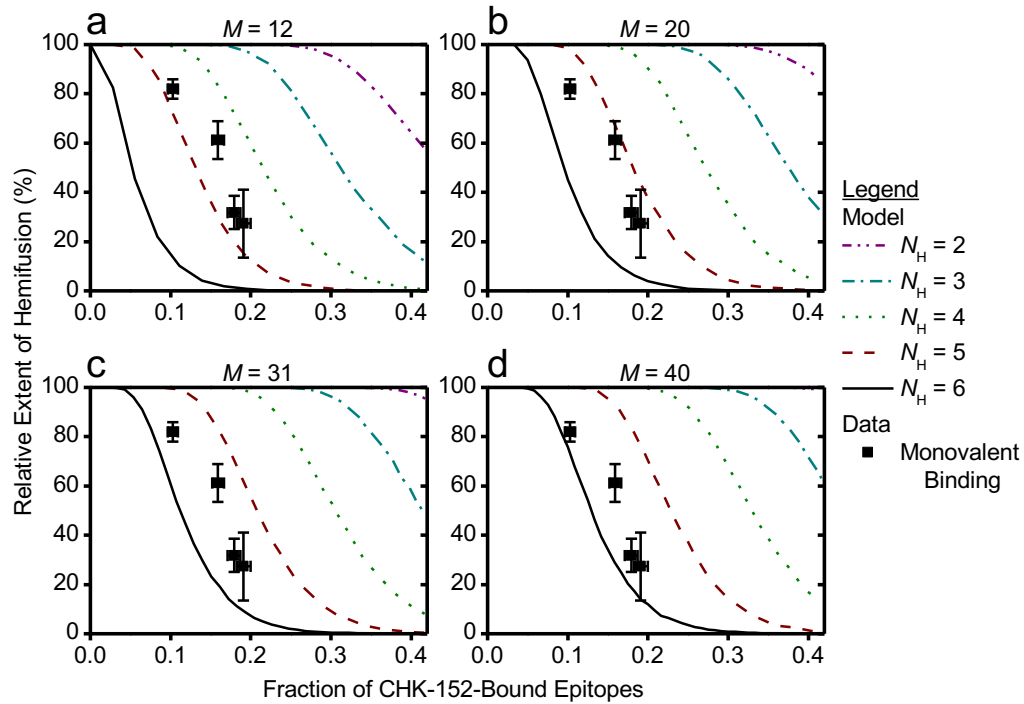

881

882 **Figure 6– Figure supplement 4 Simulation and data compared for different patch sizes,**  
883 **assuming monovalent CHK-152 binding.** Like in Figure 6, for 10 000 virions CHK-152 was randomly  
884 bound and the relative extent of fusion was determined as the fraction of virions having available  $N_H$   
885 free spikes in a ring. The extents of fusion from the simulations are shown as lines versus the fraction  
886 of CHK-152-bound epitopes on the viral surface. Line legends are as shown in Figure 6c:  $N_H = 3, 4, 5, 6$   
887 are indicated by dash-dotted, dotted, dashed and a solid line respectively. The data points (squares)  
888 shown are the same for every graph and are equal to that of Figure 6e. The simulation was adapted  
889 to assume a contact patch of  $M = 12, 20, 31, 40$  spikes as indicated above the graphs.

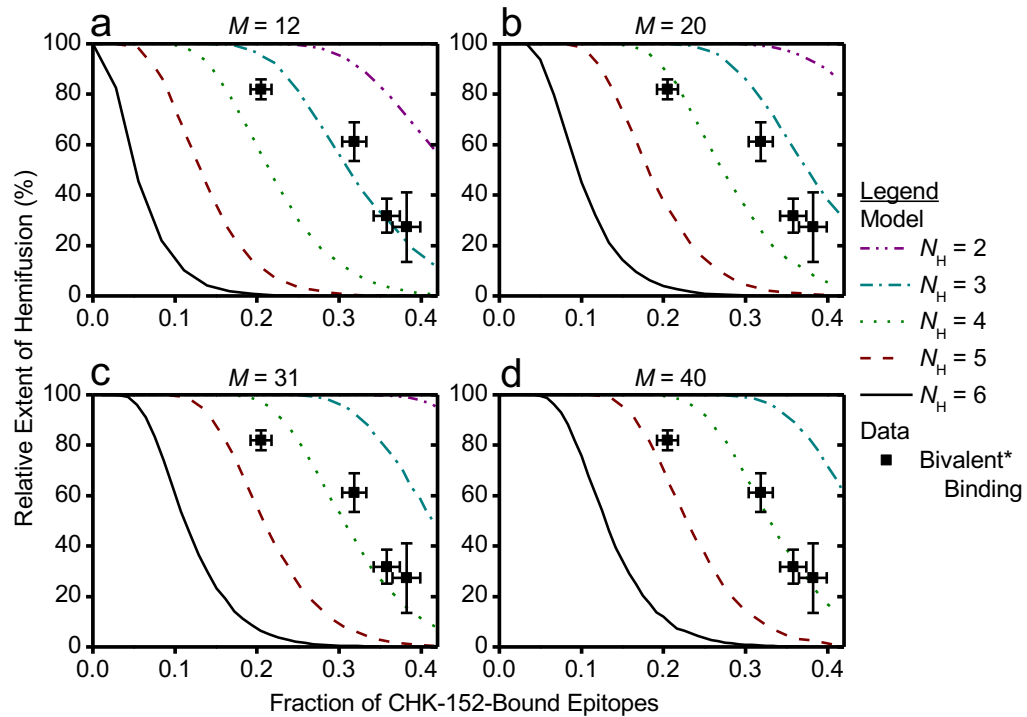

890

891 **Figure 6– Figure supplement 5 Simulation and data compared for different patch sizes,**  
892 **assuming bivalent CHK-152 binding.** Simulation, legend and data like Figure 6– Figure supplement 4,  
893 but assuming bivalent\* binding of CHK-152. This was modeled by binding double the amount of  
894 Fabs.
